# Supplementary material
Source: publisher figshare collection journal article supplement (https://acs.figshare.com/ndownloader/files/4024738)
Supplement: Supplementary file 1 [file 4024738]

# SUPPORTING INFORMATION

## Accounting for the Biogeochemical Cycle of Nitrogen in Input-Output Life Cycle Assessment

**Shweta Singh and Bhavik R. Bakshi\***

William G. Lowrie Department of Chemical and Biomolecular Engineering  
The Ohio State University, Columbus, OH 43210

June 27, 2013

### S.1 Background

#### S.1.1 The Biogeochemical cycle of N

Nitrogen is a crucial building block for existence of life and various terrestrial/aquatic ecosystems. It is considered to be a limiting factor for net primary production (NPP) in the biosphere, thus emphasizing the need for availability of nitrogen. Nitrogen exists in various forms in the biosphere but not all its forms are useful [18]. Based on the utility, nitrogen is defined into two basic forms : “inert” and “reactive”. Inert nitrogen is the form that cannot be used by plants or other organisms for production purposes (except for industrial use of gaseous nitrogen). “Reactive” nitrogen on the other hand is the form of nitrogen than can be taken up by plants and living beings and used for production [13]. The largest pool of nitrogen exists in the atmosphere as  $N_2$  gas which is “inert” nitrogen and cannot be directly used for production in ecosystem or anthropogenic systems. The biogeochemical cycle of nitrogen is the major mechanism by which the nitrogen pool from atmosphere becomes available in useful form to living beings. The transformation of inert nitrogen to reactive nitrogen involves many processes like nitrification, ammonification, etc. which change the oxidation state of nitrogen. Due to the existence of nitrogen at valence states ranging from  $-3(NH_3)$  to  $+5(NO_3^-)$  numerous transformations of nitrogen are possible. The energy released during these transformations are utilized by different organisms for their metabolic activities [18]. Therefore, these microbial actions play a significant role in the circulation of N in the geobiosphere. The natural processes which are involved in the nitrogen cycle are :  $N_2$  fixation, bacterial degradation, nitrification and denitrification. Nitrogen fixation is mainly the conversion of “inert” nitrogen to “reactive” nitrogen through natural processes of lightning or by free living and symbiotic microbes. The fixed nitrogen is further converted to  $NH_4^+$  in a process called ammonification. In presence of nitrifying bacteria like Nitrosomonas, ammonium ions are converted to nitrate ions. This process of the nitrogen cycle is called as nitrification. Further, through the process of denitrification fixed nitrogen is returned to the atmospheric pool in form of  $N_2$  and some loss of reactive N as  $N_2O$  thus closing the nutrient cycle. The natural nitrogen cycle provides important nutrients to plants and animals, thus also supporting human existence. Over the last few decades, due to the increased demand for food and other products that depend on reactive nitrogen its use and flow into the biosphere has increased tremendously [13, 12, 19]. However, the

---

\*Corresponding author, e-mail: bakshi.2@osu.edu, tel: 1-614-292-4904, fax: 1-614-292-3769

anthropogenic systems do not address full circulation and closing of nutrient cycle properly. This dramatic change makes it important to understand the relation between anthropogenic activities and the nitrogen cycle to maintain sustainable circulation of the N nutrient in the geobiosphere.

## S.2 Anthropogenic System and the Nitrogen Cycle

Reactive nitrogen being the limiting factor for the production of food and other goods, it has witnessed increased demand for sustaining human needs. Crop production is the single most important factor that has changed global nitrogen flow [17, 11]. The invention of Haber-Bosch process and production of fertilizer greatly increased the availability of reactive N for plants and reduced dependency on natural methods of nitrogen fixation. The process of making available reactive N for various purposes involves industrial nitrogen fixation from air as ammonia, which is then transformed into various products like fertilizer, synthetic fibers, plastics, animal feed, other chemicals and explosives. Thus, increase in demand of various N based products in the economy has greatly increased the artificial fixation of N in reactive form.

Artificial nitrogen fixation has greatly enhanced cropland productivity but it has negatively impacted ecosystem health, since the increased reactive N mobilization by anthropogenic activities have led to losses of reactive N to the environment [14]. There is increased concentration of reactive N in land, air and water which has negative impacts such as eutrophication, acidic soil, reduced biodiversity of plants, global warming etc. Studies have also quantified the effect of human consumption on reactive N losses and its negative effects on environment [20]. All of these studies indicate that the natural biogeochemical cycle of N has been greatly altered by human intervention. Due to increased mobilization of reactive N there is more of this component in the atmosphere and in various ecosystems which exceeds the natural rate of denitrification causing this nutrient cycle to be unbalanced. Effects of this imbalance include areas of high reactive N causing hypoxia, soil acidity, etc. Due to changes in soil and atmospheric N balance various microorganisms are possibly effected resulting in changes in natural N fixation by microorganisms in soil. However, this effect has not been validated due to inability to separate natural and anthropogenic emissions or fixation in natural systems such as soil. Such impacts of human activities on natural N biogeochemical cycle is yet not known and is currently under study [8]. However, the impact of excess reactive N presence in ecosystems can easily be seen as dead zones have developed, the soil properties have changed and global warming occurs because of  $N_2O$  emissions [12, 1, 15].

Even though high rate of formation of reactive N has negative consequences, yet it is not feasible to depend solely on natural circulation of N for satisfying the N fertilizer required for sustaining human needs [17]. It is thus, necessary to identify the potential ways of reducing the loss of reactive N to ecosystems and negative impact on ecosystems due to anthropogenic reactive N mobilization [10]. This requires the knowledge of reactive N mobilization, reactive N product end use, and reactive N losses from various human activities. Galloway et al. report that about 90% of  $NH_3$  produced by anthropogenic fixation is lost prior to human consumption [10]. This makes it extremely crucial to quantify the amount of reactive nitrogen that is being mobilized directly and indirectly by the use of economic goods and services. Even though loss of reactive N is the culprit that causes the negative impact, tracing the flow of reactive and non-reactive N to identify N use efficiency in anthropogenic systems will be helpful in devising ways of reducing such losses and meeting the objective of reducing anthropogenic impact on the N cycle.

### S.3 Methodology for Calculation of $V_{ph}$ in The Model

Each  $V_{ph}$  vector mentioned in Table S.1 for Nitrogen components are calculated by allocation of total national flows to the peripheral sectors mentioned in Table S.1. The total national level flows are mentioned in Table S.1 along with the peripheral sectors to which it is allocated. The allocation is done similar to other EEIO approach where resource flows (Nr Mobilization and Nr Product categories) are mapped to sectors that extract or use it directly for production and Nr Emissions is mapped to peripheral sector that directly emits the Nr. The monetary size of these sectors are available from BEA. For the flows where physical basis of allocation such as land area was not available we have used monetary size of sectors as the allocation basis. This is the method adopted by several Input-Output researchers in scenario of lack of actual data. For some of the flows such as allocation of “Atmospheric Deposition” land area of the appropriate sectors was used to calculate each sector input of this flow. Since, atmospheric deposition is an aerial phenomenon; assumption of allocation based on land area was an appropriate way. For manure allocation we have revised allocation based on percentage of acres for each crop receiving manure based on USDA estimates [7]. Other flows are allocated based on monetary size of sector. This assumption is fairly valid for allocation of resources because a sector with higher monetary size may be using more resources. However, in ideal case we will need to use actual physical data which is not available as of now. The model will still perform well, to give insights into direct and indirect flows. A slight over or under estimation do not prove to be an issue because of the coarse scale of the model.

#### S.3.1 Choice of Ghosh Model

In this work, we treated the Nr flows that are used for supporting economic production as resources entering the economy and thus used the Ghosh model to calculate life cycle values for each sector. Since, the Ghosh model is only used to trace the linkages in economy and not implying a causal relationship between supply of resource and productivity of sectors; the use of Ghosh model here is free of the controversies in the literature. The fact that Ghosh matrix is only a different representation of same economic network as Leontief matrix it is valid to use it for IO-LCA calculations

Table S.1: Components of Eco-LCA Nitrogen Life Cycle Inventory

|                            | LCI Components                                 | Source | Peripheral Sectors                                                                          | Values (Tg-N) |
|----------------------------|------------------------------------------------|--------|---------------------------------------------------------------------------------------------|---------------|
| Reactive N Mobilization    | N fixed by soil micro-organisms                | [19]   | Farming, Cattle Ranching and Farming<br>Forest Nurseries, forest products & timber tracts   | 1.15E-04      |
|                            | Legume N Fixation (Soyabean)                   | [3]    | Oilseed farming                                                                             | 3.30E+00      |
|                            | Legume N Fixation (Alfalfa)                    | [3]    | All other crop farming                                                                      | 2.10E+00      |
|                            | Legume N Fixation (Other, peanuts, lentils etc | [3]    | & Vegetable & melon farming                                                                 | 2.40E+00      |
|                            | N input by atmospheric deposition              | [6]    | Farming, Cattle Ranching & Farming<br>Forest Nurseries, forest products & timber tracts     | 6.90E+00      |
|                            | Industrial N fixation as Ammonia               | [4]    | Nitrogenous Fertilizer Manu.                                                                | 1.03E+01      |
| Reactive N End Use         | N used as farm fertilizer                      | [6]    | All farming                                                                                 | 1.02E+01      |
|                            | N used as non-farm fertilizer                  | [6]    | Residential Unit, Commercial & institutional buildings                                      | 3.24E-01      |
|                            | N used as Livestock Manure                     | [6]    | Farming; Commercial & institutional buildings                                               | 5.84E+00      |
|                            | N in Plastics & Synthetics Manu.               | [5]    | Plastics material & resin manu. ; Synthetic rubber manu.; Noncellulosic organic fiber manu. | 7.26E-01      |
|                            | N in Explosives Manu.                          | [5]    | Explosives Manu.                                                                            | 1.48E+00      |
|                            | N in Animal Feed and other chemical manu.      | [5]    | Other basic inorganic chemical manu.                                                        | 1.13E-01      |
|                            | N consumed by human as Harvested Crop          | [16]   | Agricultural Food Processing                                                                | 1.30E+00      |
|                            | N consumed by human as Animal Food(Meat)       | [16]   | Dairy and meat processing                                                                   | 9.00E-01      |
| Continued on next page ... |                                                |        |                                                                                             |               |

Table S.1 – continued from previous page

|                                        | LCI Components                                                                                                   | Source | Peripheral Sector                                                                                | Values (Tg-N) |
|----------------------------------------|------------------------------------------------------------------------------------------------------------------|--------|--------------------------------------------------------------------------------------------------|---------------|
| Reactive N Loss to Air, Water and Land | $N_2O$ emissions from fuel use                                                                                   | [9]    | All sectors                                                                                      | 4.80E-02      |
|                                        | $NO_x$ emissions from fuel use                                                                                   | [2]    | Respective Sectors                                                                               | 5.32E+00      |
|                                        | $N_2O$ emissions from manure management                                                                          | [9]    | Cattle ranching & farming; Poultry & egg production; Animal prod, except cattle & poultry & eggs | 3.64E-02      |
|                                        | $N_2O$ direct emission from Agricultural Soil Management-cropland & grassland                                    | [9]    | All farming & Cattle, ranching & farming sectors                                                 | 3.51E-01      |
|                                        | $N_2O$ indirect emission from Agricultural Soil Management-cropland,grassland, forest & settlements              | [9]    | All farming; Forestry & Residential Settlement                                                   | 9.22E-02      |
|                                        | $N_2O$ field burning of agricultural residues                                                                    | [9]    | Oilseed, Grain & All other crop farming                                                          | 1.08E-03      |
|                                        | $NO_x$ field burning of agricultural residues                                                                    | [9]    | Oilseed, Grain & All other crop farming                                                          | 1.53E-02      |
|                                        | $N_2O$ forest fire emissions                                                                                     | [9]    | Forest nurseries, forest products & timber tracts                                                | 2.11E-02      |
|                                        | $N_2O$ direct emissions from soil management- forest land remaining forest land and land converted to forestland | [9]    | Forest nurseries, forest products & timber tracts.                                               | 6.40E-04      |
|                                        | $N_2O$ direct emissions from soil management-emissions from settlement soils                                     | [9]    | Urban Land                                                                                       | 2.56E-03      |
|                                        | $N_2O$ emissions from nitric acid production                                                                     | [9]    | Nitrogenous Fertilizer Manu.                                                                     | 3.78E-02      |
|                                        | $N_2O$ emissions from adipic acid production                                                                     | [9]    | Plastics material & resin manu.                                                                  | 1.09E-02      |
|                                        | $N_2O$ emissions from domestic water water treatment                                                             | [9]    | Water, sewage & other systems                                                                    | 9.60E-03      |
|                                        | $N_2O$ emissions from composting                                                                                 | [9]    | Waste management & remediation services                                                          | 3.20E-03      |
|                                        | N loading to water (Ammonia N)                                                                                   | [6]    | All farming, Cattle ranching & farming & water sewage & other systems                            | 2.44E-02      |
|                                        | N loading to water (Inorganic N as Nitrite and Nitrate)                                                          | [6]    | All farming , Cattle ranching & farming & water sewage & other systems                           | 7.41E-01      |
|                                        | N loading to water (Organic N)                                                                                   | [6]    | All farming, Cattle ranching & farming, water sewage & other systems                             | 1.64E-01      |
|                                        | N sewage sludge applied to agricultural land                                                                     | Calc.  | All farming , Cattle ranching & farming                                                          | 1.44E-01      |

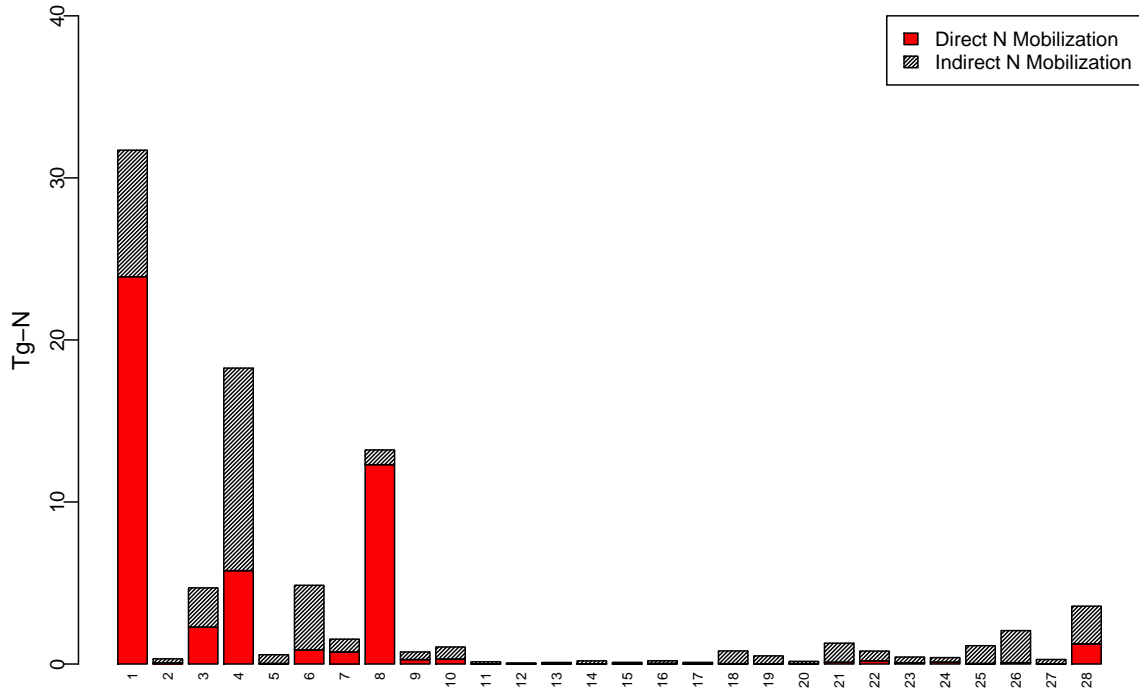

Figure S.1: Reactive N Profile for 2002 Economic Sectors. Legend for x-axis. 1: Agriculture, Livestock, Forestry & Fisheries 2: Mining & Utilities 3 : Construction 4: Food, Beverage & Tobacco 5: Textiles, Apparel & Leather 6: Wood, Paper & Printing 7: Petroleum & Basic Chemical 8: Resin, Rubber, Artificial Fibers, Agri Chem & Pharma 9: Paint, Adhesives, Cleaning & Other Chem 10: Plastics, Rubber & Non-metallic mineral prod 11: Ferrous & non-ferrous metal prod. 12: Cutlery, Handtools, Struc. & Metal Containers 13: Other metal hardware & ordnance manu. 14: Machinery & Engines 15: Computers, Audio-Video & Comm. Equip 16: Semiconductors, Elec Equip & Media Reproduction 17: Lighting, Electrical Compo. & Batteries 18: Vehicles & Other Transportation Equip 19: Furniture, Medical, Equip & Supplies 20: Other Misc. Manu. 21: Trade, Transportation & Commu. media 22: Finance, Insu, Real-Estate, Rental & Leasing 23: Professional & Technical Services 24: Management, Admin & Waste Services 25: Education & Health Care Services 26: Arts, Entertainment, Hotels & Food Services 27: Other services except Public Administration 28: Government & Special Services

## S.4 Direct and Indirect Flows

Figures S.1, S.2, and S.3 show the direct and indirect flows for the aggregated sectors and correspond to 2, 3, and 4 in the main paper.

The remaining figures focus on the top five aggregated sectors for each profile and show the details of sectors that constitute each aggregate sector.

N mobilization: “Agriculture, Livestock, Forestry and Fisheries (1),” “Food, Beverage & Tobacco (4),” “Resin, Rubber, Artificial Fibers, Agri Chem & Pharma (8),” “Wood, Paper & Printing (6),” “Construction (3).”

N in products: “Agriculture, Livestock, Forestry and Fisheries (1),” “Food, Beverage and Tobacco (4),” “Construction (3),” “Paint, Adhesives, Cleaning & other Chemicals (9),” and “Resin, Rubber, Artificial fibers, Agri. Chemicals & Pharma (8).”

N emissions: “Agriculture, Livestock, Forestry and Fisheries (1),” “Mining and Utilities (2),” “Food, Beverage and Tobacco (4),” “Trade, Transportation & Commu. media (21),” “Government & Special Services (28).”

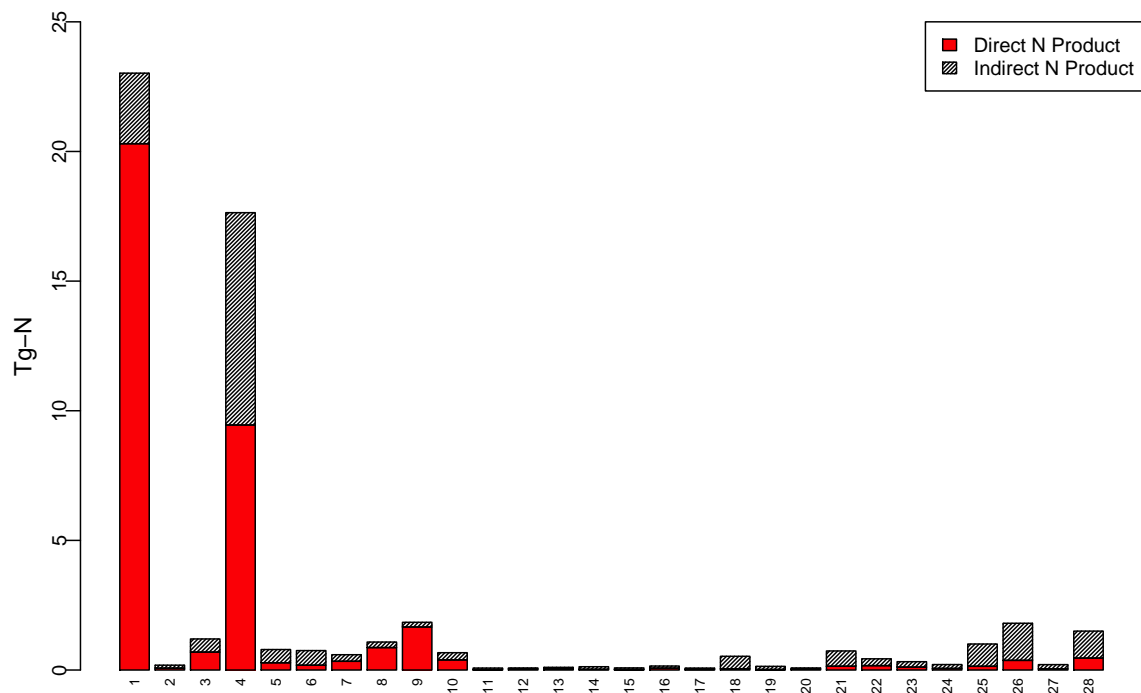

Figure S.2: Product N Profile for 2002 Economic Sectors. Legend for x-axis is in Figure S.1

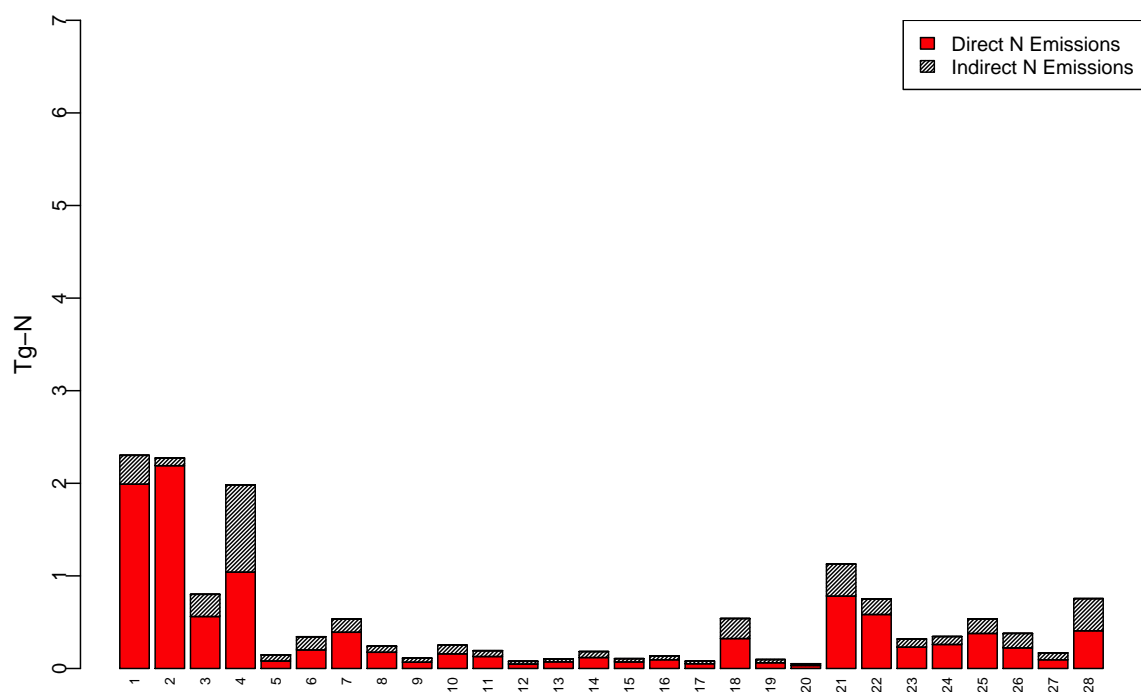

Figure S.3: N emissions Profile for 2002 Economic Sectors. Legend for x-axis is in Figure S.1

Continued on next page ...

**Table S.2 – continued from previous page**

| Number | NAICS | Sector Name | Aggregated Sectors |
|--------|-------|-------------|--------------------|
|--------|-------|-------------|--------------------|

Table S.2: Aggregation scheme for 2002 U.S. economy

| Number | NAICS  | Sector Name                                                   | Aggregated Sectors                                 |
|--------|--------|---------------------------------------------------------------|----------------------------------------------------|
| 1      | 1111A0 | Oilseed Farming                                               | Agriculture, Livestock, Forestry and Fisheries (1) |
| 2      | 1111B0 | Grain Farming                                                 |                                                    |
| 3      | 111200 | Vegetable and Melon Farming                                   |                                                    |
| 4      | 111335 | Tree Nut Farming                                              |                                                    |
| 5      | 1113A0 | Fruit Farming                                                 |                                                    |
| 6      | 111400 | Greenhouse, nursery and floriculture production               |                                                    |
| 7      | 111910 | Tobacco farming                                               |                                                    |
| 8      | 111920 | Cotton farming                                                |                                                    |
| 9      | 1119A0 | Sugarcane and sugar beet farming                              |                                                    |
| 10     | 1119B0 | All other crop farming                                        |                                                    |
| 11     | 112120 | Dairy cattle and milk production                              |                                                    |
| 12     | 1121A0 | Cattle ranching and farming                                   |                                                    |
| 13     | 112300 | Poultry and egg production                                    |                                                    |
| 14     | 112A00 | Animal production (other)                                     |                                                    |
| 15     | 113300 | Logging                                                       |                                                    |
| 16     | 113A00 | Forest nurseries, forest productions and timber tracts        |                                                    |
| 17     | 114100 | Fishing                                                       |                                                    |
| 18     | 114200 | Hunting and Trapping                                          |                                                    |
| 19     | 115000 | Support activities for agriculture and forestry               |                                                    |
| 20     | 211000 | Oil and gas extraction                                        | Mining and Utilities (2)                           |
| 21     | 212100 | Coal mining                                                   |                                                    |
| 22     | 212210 | Iron Ore Mining                                               |                                                    |
| 23     | 212230 | Copper, Nickel, Lead and Zinc Mining                          |                                                    |
| 24     | 2122A0 | Gold, Silver and other metal ore mining                       |                                                    |
| 25     | 212310 | Stone mining and quarrying                                    |                                                    |
| 26     | 212320 | Sand, gravel, clay and ceramic and refractory minerals mining |                                                    |
| 27     | 212390 | Other nonmetallic mineral mining                              |                                                    |
| 28     | 213111 | Drilling oil and gas wells                                    |                                                    |
| 29     | 213112 | Support activities for oil and gas operations                 |                                                    |
| 30     | 21311A | Support activities for other mining                           |                                                    |
| 31     | 221100 | Electric power generation, transmission and distribution      |                                                    |
| 32     | 221200 | Natural gas distribution                                      |                                                    |
| 33     | 221300 | Water, Sewage and other systems                               |                                                    |

Continued on next page ...



**Table S.2 – continued from previous page**

| Number | NAICS  | Sector Name                                                    | Aggregated Sectors             |
|--------|--------|----------------------------------------------------------------|--------------------------------|
| 34     | 230101 | Nonresidential commercial and health care structures           | Construction (3)               |
| 35     | 230102 | Nonresidential manufacturing structures                        |                                |
| 36     | 230103 | Other nonresidential structures                                |                                |
| 37     | 230201 | Residential permanent site single and multi-family structures  |                                |
| 38     | 230202 | Other residential structures                                   |                                |
| 39     | 230301 | Nonresidential maintenance and repair                          |                                |
| 40     | 230302 | Residential maintenance and repair                             |                                |
| 41     | 311111 | Dog and cat food manufacturing                                 | Food, Beverage and Tobacco (4) |
| 42     | 311119 | Other animal food manufacturing                                |                                |
| 43     | 311210 | Flour milling and malt manufacturing                           |                                |
| 44     | 311221 | Wet corn milling                                               |                                |
| 45     | 311225 | Fats and oils refining and blending                            |                                |
| 46     | 31122A | Soybean and other oilseed processing                           |                                |
| 47     | 311230 | Breakfast cereal manufacturing                                 |                                |
| 48     | 311313 | Beet sugar manufacturing                                       |                                |
| 49     | 31131A | Sugar cane mills and refining                                  |                                |
| 50     | 311320 | Chocolate and confectionery manufacturing from cacao beans     |                                |
| 51     | 311330 | Confectionery manufacturing from purchased chocolate           |                                |
| 52     | 311340 | Nonchocolate confectionery manufacturing                       |                                |
| 53     | 311410 | Frozen food manufacturing                                      |                                |
| 54     | 311420 | Fruit and vegetable canning, pickling and drying               |                                |
| 55     | 311513 | Cheese manufacturing                                           |                                |
| 56     | 311514 | Dry, condensed and evaporated dairy product manufacturing      |                                |
| 57     | 31151A | Fluid milk and butter manufacturing                            |                                |
| 58     | 311520 | Ice cream and frozen dessert manufacturing                     |                                |
| 59     | 311615 | Poultry processing                                             |                                |
| 60     | 31161A | Animal (except poultry) slaughtering, rendering and processing |                                |
| 61     | 311700 | Seafood product preparation and packaging                      |                                |
| 62     | 311810 | Bread and bakery product manufacturing                         |                                |
| 63     | 311820 | Cookie, cracker and pasta manufacturing                        |                                |
|        |        |                                                                | Continued on next page ...     |

**Table S.2 – continued from previous page**

| Number                     | NAICS  | Sector Name                                          | Aggregated Sectors                |
|----------------------------|--------|------------------------------------------------------|-----------------------------------|
| 64                         | 311830 | Tortilla manufacturing                               |                                   |
| 65                         | 311910 | Snack food manufacturing                             |                                   |
| 66                         | 311920 | Coffee and tea manufacturing                         |                                   |
| 67                         | 311930 | Flavoring syrup and concentrate manufacturing        |                                   |
| 68                         | 311940 | Seasoning and dressing manufacturing                 |                                   |
| 69                         | 311990 | All other food manufacturing                         |                                   |
| 70                         | 312110 | Soft drink and ice manufacturing                     |                                   |
| 71                         | 312120 | Breweries                                            |                                   |
| 72                         | 312130 | Wineries                                             |                                   |
| 73                         | 312140 | Distilleries                                         |                                   |
| 74                         | 3122A0 | Tobacco product manufacturing                        |                                   |
| 75                         | 313100 | Fiber, yarn and thread mills                         | Textiles, Apparel and Leather (5) |
| 76                         | 313210 | Broadwoven fabric mills                              |                                   |
| 77                         | 313220 | Narrow fabric mills and machine embroidery           |                                   |
| 78                         | 313230 | Non-woven fabric mills                               |                                   |
| 79                         | 313240 | Knit fabric mills                                    |                                   |
| 80                         | 313310 | Textile and fabric finishing mills                   |                                   |
| 81                         | 313320 | Fabric coating mills                                 |                                   |
| 82                         | 314110 | Carpet and rug mills                                 |                                   |
| 83                         | 314120 | Curtain and linen mills                              |                                   |
| 84                         | 314910 | Textile bag and canvas mills                         |                                   |
| 85                         | 314990 | All other textile product mills                      |                                   |
| 86                         | 315100 | Apparel knitting mills                               |                                   |
| 87                         | 315210 | Cut and sew apparel contractors                      |                                   |
| 88                         | 315220 | Men’s and boys’ cut and sew apparel manufacturing    |                                   |
| 89                         | 315230 | Women’s and girls’ cut and sew apparel manufacturing |                                   |
| 90                         | 315290 | Other cut and sew apparel manufacturing              |                                   |
| 91                         | 315900 | Apparel accessories and other apparel manufacturing  |                                   |
| 92                         | 316100 | Leather and hide tanning and finishing               |                                   |
| 93                         | 316200 | Footwear manufacturing                               |                                   |
| 94                         | 316900 | Other leather and allied product manufacturing       |                                   |
| 95                         | 321100 | Sawmills and wood preservation                       | Wood Paper and Printing (6)       |
| 96                         | 321219 | Reconstituted wood product manufacturing             |                                   |
| 97                         | 32121A | Veneer and plywood manufacturing                     |                                   |
| Continued on next page ... |        |                                                      |                                   |

**Table S.2 – continued from previous page**

| Number                     | NAICS  | Sector Name                                                                 | Aggregated Sectors               |
|----------------------------|--------|-----------------------------------------------------------------------------|----------------------------------|
| 98                         | 32121B | Engineered wood member and truss manufacturing                              |                                  |
| 99                         | 321910 | Wood windows and doors and mill-work                                        |                                  |
| 100                        | 321920 | Wood container and pallet manufacturing                                     |                                  |
| 101                        | 321991 | Manufactured home (mobile home) manufacturing                               |                                  |
| 102                        | 321992 | Prefabricated wood building manufacturing                                   |                                  |
| 103                        | 321999 | All other miscellaneous wood product manufacturing                          |                                  |
| 104                        | 322110 | Pulp mills                                                                  |                                  |
| 105                        | 322120 | Paper Mills                                                                 |                                  |
| 106                        | 322130 | Paperboard mills                                                            |                                  |
| 107                        | 322210 | Paperboard container manufacturing                                          |                                  |
| 108                        | 32222A | Coated and laminated paper, packaging paper and plastics film manufacturing |                                  |
| 109                        | 32222B | All other paper back and coated and treated paper manufacturing             |                                  |
| 110                        | 322230 | Stationery product manufacturing                                            |                                  |
| 111                        | 322291 | Sanitary paper product manufacturing                                        |                                  |
| 112                        | 322299 | All other converted paper product manufacturing                             |                                  |
| 113                        | 323110 | Printing                                                                    |                                  |
| 114                        | 323120 | Support activities for printing                                             |                                  |
| 115                        | 324110 | Petroleum refineries                                                        | Petroleum and Basic Chemical (7) |
| 116                        | 324121 | Asphalt paving mixture and block manufacturing                              |                                  |
| 117                        | 324122 | Asphalt shingle and coating materials manufacturing                         |                                  |
| 118                        | 324191 | Petroleum lubricating oil and grease manufacturing                          |                                  |
| 119                        | 324199 | All other petroleum and coal products manufacturing                         |                                  |
| 120                        | 325110 | Petrochemical manufacturing                                                 |                                  |
| 121                        | 325120 | Industrial gas manufacturing                                                |                                  |
| 122                        | 325130 | Synthetic dye and pigment manufacturing                                     |                                  |
| 123                        | 325181 | Alkalies and chlorine manufacturing                                         |                                  |
| 124                        | 325182 | Carbon black manufacturing                                                  |                                  |
| Continued on next page ... |        |                                                                             |                                  |

**Table S.2 – continued from previous page**

| Number                     | NAICS  | Sector Name                                                               | Aggregated Sectors                                                      |
|----------------------------|--------|---------------------------------------------------------------------------|-------------------------------------------------------------------------|
| 125                        | 325188 | All other basic inorganic chemical manufacturing                          |                                                                         |
| 126                        | 325190 | Other basic organic chemical manufacturing                                |                                                                         |
| 127                        | 325211 | Plastics material and resin manufacturing                                 | Resin, Rubber, Artificial Fibers, Agricultural Chemicals and Pharma (8) |
| 128                        | 325212 | Synthetic rubber manufacturing                                            |                                                                         |
| 129                        | 325220 | Artificial and synthetic fibers and filaments manufacturing               |                                                                         |
| 130                        | 325310 | Fertilizer manufacturing                                                  |                                                                         |
| 131                        | 325320 | Pesticide and other agricultural chemical manufacturing                   |                                                                         |
| 132                        | 325411 | Medicinal and botanical manufacturing                                     |                                                                         |
| 133                        | 325412 | Pharmaceutical preparation manufacturing                                  |                                                                         |
| 134                        | 325413 | In-vitro diagnostic substance manufacturing                               |                                                                         |
| 135                        | 325414 | Biological product (except diagnostic) manufacturing                      |                                                                         |
| 136                        | 325510 | Paint and coating manufacturing                                           | Paint, Adhesives, Cleaning and Other Chemicals (9)                      |
| 137                        | 325520 | Adhesive manufacturing                                                    |                                                                         |
| 138                        | 325610 | Soap and cleaning compound manufacturing                                  |                                                                         |
| 139                        | 325620 | Toilet preparation manufacturing                                          |                                                                         |
| 140                        | 325910 | Printing ink manufacturing                                                |                                                                         |
| 141                        | 3259A0 | All other chemical product and preparation manufacturing                  |                                                                         |
| 142                        | 326110 | Plastics packaging materials and unlaminated film and sheet manufacturing | Plastics, Rubber and Non-metallic mineral products (10)                 |
| 143                        | 326121 | Unlaminated plastics profile shape manufacturing                          |                                                                         |
| 144                        | 326122 | Plastic pipe and pipe fitting manufacturing                               |                                                                         |
| 145                        | 326130 | Laminated plastics plate, sheet (except packaging)and shape manufacturing |                                                                         |
| 146                        | 326140 | Polystyrene foam product manufacturing                                    |                                                                         |
| 147                        | 326150 | Urethane and other foam product (except polystyrene) manufacturing        |                                                                         |
| Continued on next page ... |        |                                                                           |                                                                         |

**Table S.2 – continued from previous page**

| Number | NAICS  | Sector Name                                                 | Aggregated Sectors                            |
|--------|--------|-------------------------------------------------------------|-----------------------------------------------|
| 148    | 326160 | Plastics bottle manufacturing                               |                                               |
| 149    | 32619A | Other plastics product manufacturing                        |                                               |
| 150    | 326210 | Tire manufacturing                                          |                                               |
| 151    | 326220 | Rubber and plastics hoses and belting manufacturing         |                                               |
| 152    | 326290 | Other rubber product manufacturing                          |                                               |
| 153    | 32711A | Pottery, ceramics and plumbing fixture manufacturing        |                                               |
| 154    | 32712A | Brick, tile and other structural clay product manufacturing |                                               |
| 155    | 32712B | Clay and nonclay refractory manufacturing                   |                                               |
| 156    | 327211 | Flat glass manufacturing                                    |                                               |
| 157    | 327212 | Other pressed and blown glass and glassware manufacturing   |                                               |
| 158    | 327213 | Glass container manufacturing                               |                                               |
| 159    | 327215 | Glass product manufacturing made of purchased glass         |                                               |
| 160    | 327310 | Cement manufacturing                                        |                                               |
| 161    | 327320 | Ready-mix concrete manufacturing                            |                                               |
| 162    | 327330 | Concrete pipe, brick and block manufacturing                |                                               |
| 163    | 327390 | Other concrete product manufacturing                        |                                               |
| 164    | 3274A0 | Lime and gypsum product manufacturing                       |                                               |
| 165    | 327910 | Abrasive product manufacturing                              |                                               |
| 166    | 327991 | Cut stone and stone product manufacturing                   |                                               |
| 167    | 327992 | Ground or treated mineral and earth manufacturing           |                                               |
| 168    | 327993 | Mineral wool manufacturing                                  |                                               |
| 169    | 327999 | Miscellaneous nonmetallic mineral products                  |                                               |
| 170    | 331110 | Iron and steel mills and ferroalloy manufacturing           | Ferrous and non-ferrous metal production (11) |
| 171    | 331200 | Steel product manufacturing from purchased steel            |                                               |
| 172    | 331314 | Secondary smelting and alloying of aluminum                 |                                               |
| 173    | 33131A | Alumina refining and primary aluminum production            |                                               |
| 174    | 33131B | Aluminum product manufacturing from purchased aluminum      |                                               |
|        |        |                                                             | Continued on next page ...                    |

**Table S.2 – continued from previous page**

| Number                     | NAICS  | Sector Name                                                                            | Aggregated Sectors                                        |
|----------------------------|--------|----------------------------------------------------------------------------------------|-----------------------------------------------------------|
| 175                        | 331411 | Primary smelting and refining of copper                                                |                                                           |
| 176                        | 331419 | Primary smelting and refining of non-ferrous metal (except copper and aluminum)        |                                                           |
| 177                        | 331420 | Copper rolling, drawing , extruding and alloying                                       |                                                           |
| 178                        | 331490 | Nonferrous metal (except copper and aluminum) rolling, drawing, extruding and alloying |                                                           |
| 179                        | 331510 | Ferrous metal foundries                                                                |                                                           |
| 180                        | 331520 | Nonferrous metal foundries                                                             |                                                           |
| 181                        | 332114 | Custom roll forming                                                                    |                                                           |
| 182                        | 33211A | All other forging, stamping and sintering                                              |                                                           |
| 183                        | 33211B | Crown and closure manufacturing and metal stamping                                     |                                                           |
| 184                        | 33221A | Cutlery, utensil, pot and pan manufacturing                                            | Cutlery, Handtools , Structural and Metal Containers (12) |
| 185                        | 33221B | Handtool manufacturing                                                                 |                                                           |
| 186                        | 332310 | Plate work and fabricated structural product manufacturing                             |                                                           |
| 187                        | 332320 | Ornamental and architectural metal products manufacturing                              |                                                           |
| 188                        | 332410 | Power boiler and heat exchanger manufacturing                                          |                                                           |
| 189                        | 332420 | Metal tank (heavy gauge) manufacturing                                                 |                                                           |
| 190                        | 332430 | Metal can, box and other metal container (light gauge) manufacturing                   |                                                           |
| 191                        | 332500 | Hardware manufacturing                                                                 | Other metal hardware and ordnance manufacturing (13)      |
| 192                        | 332600 | Spring and wire product manufacturing                                                  |                                                           |
| 193                        | 332710 | Machine shops                                                                          |                                                           |
| 194                        | 332720 | Turned product and screw, nut and bolt manufacturing                                   |                                                           |
| 195                        | 332800 | Coating, engraving, heat treating and allied activities                                |                                                           |
| 196                        | 332913 | Plumbing fixture fitting and trim manufacturing                                        |                                                           |
| 197                        | 33291A | Valve and fittings other than plumbing                                                 |                                                           |
| Continued on next page ... |        |                                                                                        |                                                           |

**Table S.2 – continued from previous page**

Table S.2 – continued from previous page

| Number                     | NAICS  | Sector Name                                                                  | Aggregated Sectors         |
|----------------------------|--------|------------------------------------------------------------------------------|----------------------------|
| 198                        | 332991 | Ball and roller bearing manufacturing                                        |                            |
| 199                        | 332996 | Fabricated pipe and pipe fitting manufacturing                               |                            |
| 200                        | 33299A | Ammunition manufacturing                                                     |                            |
| 201                        | 33299B | Arms, ordnance and accessories manufacturing                                 |                            |
| 202                        | 33299C | Other fabricated metal manufacturing                                         |                            |
| 203                        | 333111 | Farm machinery and equipment manufacturing                                   | Machinery and Engines (14) |
| 204                        | 333112 | Lawn and garden equipment manufacturing                                      |                            |
| 205                        | 333120 | Construction machinery manufacturing                                         |                            |
| 206                        | 333130 | Mining and oil and gas field machinery manufacturing                         |                            |
| 207                        | 333220 | Plastics and rubber industry machinery manufacturing                         |                            |
| 208                        | 333295 | Semiconductor machinery manufacturing                                        |                            |
| 209                        | 33329A | Other industrial machinery manufacturing                                     |                            |
| 210                        | 333314 | Optical instrument and lens manufacturing                                    |                            |
| 211                        | 333315 | Photographic and photocopying equipment manufacturing                        |                            |
| 212                        | 333319 | Other commercial and service industry machinery manufacturing                |                            |
| 213                        | 33331A | Vending, commercial, industrial and office machinery manufacturing           |                            |
| 214                        | 333414 | Heating equipment except warm air furnaces                                   |                            |
| 215                        | 333415 | Air conditioning, refrigeration and warm air heating equipment manufacturing |                            |
| 216                        | 33341A | Air purification and ventilation equipment manufacturing                     |                            |
| 217                        | 333511 | Industrial mold manufacturing                                                |                            |
| 218                        | 333514 | Special tool,die, jig and fixture manufacturing                              |                            |
| 219                        | 333515 | Cutting tool and machine tool accessory manufacturing                        |                            |
| 220                        | 33351A | Metal cutting and forming machine tool manufacturing                         |                            |
| 221                        | 33351B | Rolling mill and other metalworking machinery manufacturing                  |                            |
| Continued on next page ... |        |                                                                              |                            |

**Table S.2 – continued from previous page**

| Number | NAICS  | Sector Name                                                              | Aggregated Sectors                                                |
|--------|--------|--------------------------------------------------------------------------|-------------------------------------------------------------------|
| 222    | 333611 | Turbine and turbine generator set units manufacturing                    |                                                                   |
| 223    | 333612 | Speed changer, industrial high-speed drive and gear manufacturing        |                                                                   |
| 224    | 333613 | Mechanical power transmission equipment manufacturing                    |                                                                   |
| 225    | 333618 | Other engine equipment manufacturing                                     |                                                                   |
| 226    | 333911 | Pump and pumping equipment manufacturing                                 |                                                                   |
| 227    | 333912 | Air and gas compressor manufacturing                                     |                                                                   |
| 228    | 333920 | Material handling equipment manufacturing                                |                                                                   |
| 229    | 333991 | Power-driven hand-tool manufacturing                                     |                                                                   |
| 230    | 333993 | Packaging machinery manufacturing                                        |                                                                   |
| 231    | 333994 | Industrial process furnace and oven manufacturing                        |                                                                   |
| 232    | 33399A | Other general purpose machinery manufacturing                            |                                                                   |
| 233    | 33399B | Fluid power process machinery                                            |                                                                   |
| 234    | 334111 | Electronic computer manufacturing                                        | Computers, Audio-Video and Communications Equipments (15)         |
| 235    | 334112 | Computer storage device manufacturing                                    |                                                                   |
| 236    | 33411A | Computer terminals and other computer peripheral equipment manufacturing |                                                                   |
| 237    | 334210 | Telephone apparatus manufacturing                                        |                                                                   |
| 238    | 334220 | Broadcast and wireless communications equipment                          |                                                                   |
| 239    | 334290 | Other communications equipment manufacturing                             |                                                                   |
| 240    | 334300 | Audio and video equipment manufacturing                                  |                                                                   |
| 241    | 334411 | Electron tube manufacturing                                              |                                                                   |
| 242    | 334412 | Bare printed circuit board manufacturing                                 |                                                                   |
| 243    | 334413 | Semiconductor and related device manufacturing                           | Semiconductors, Electronic Equipments and Media Reproduction (16) |
| 244    | 334417 | Electronic connector manufacturing                                       |                                                                   |

Continued on next page ...



**Table S.2 – continued from previous page**

| Number | NAICS  | Sector Name                                                                        | Aggregated Sectors                                 |
|--------|--------|------------------------------------------------------------------------------------|----------------------------------------------------|
| 245    | 334418 | Printed circuit assembly (electronic assembly) manufacturing                       |                                                    |
| 246    | 334419 | Other electronic component manufacturing                                           |                                                    |
| 247    | 33441A | Electronic capacitor, resistor, coil, transformer and other inductor manufacturing |                                                    |
| 248    | 334510 | Electromedical and electrotherapeutic apparatus manufacturing                      |                                                    |
| 249    | 334511 | Search, detection and navigation instruments manufacturing                         |                                                    |
| 250    | 334512 | Automatic environmental control manufacturing                                      |                                                    |
| 251    | 334513 | Industrial process variable instruments manufacturing                              |                                                    |
| 252    | 334514 | Totalizing fluid meters and counting devices manufacturing                         |                                                    |
| 253    | 334515 | Electricity and signal testing instruments manufacturing                           |                                                    |
| 254    | 334516 | Analytical laboratory instrument manufacturing                                     |                                                    |
| 255    | 334517 | Irradiation apparatus manufacturing                                                |                                                    |
| 256    | 33451A | Watch, clock and other measuring and controlling device manufacturing              |                                                    |
| 257    | 334613 | Magnetic and optical recording media manufacturing                                 |                                                    |
| 258    | 33461A | Software, audio and video media reproducing                                        |                                                    |
| 259    | 335110 | Electric lamp bulb and part manufacturing                                          | Lighting, Electrical Components and Batteries (17) |
| 260    | 335120 | Lighting fixture manufacturing                                                     |                                                    |
| 261    | 335210 | Small electrical appliance manufacturing                                           |                                                    |
| 262    | 335221 | Household cooking appliance manufacturing                                          |                                                    |
| 263    | 335222 | Household refrigerator and home freezer manufacturing                              |                                                    |
| 264    | 335224 | Household laundry equipment manufacturing                                          |                                                    |
| 265    | 335228 | Other major household appliance manufacturing                                      |                                                    |
| 266    | 335311 | Power, distribution and specialty transformer manufacturing                        |                                                    |
| 267    | 335312 | Motor and generator manufacturing                                                  |                                                    |
|        |        |                                                                                    | Continued on next page ...                         |

**Table S.2 – continued from previous page**

| Number                     | NAICS  | Sector Name                                                              | Aggregated Sectors                               |
|----------------------------|--------|--------------------------------------------------------------------------|--------------------------------------------------|
| 268                        | 335313 | Switchgear and switchboard apparatus manufacturing                       |                                                  |
| 269                        | 335314 | Relay and industrial control manufacturing                               |                                                  |
| 270                        | 335911 | Storage battery manufacturing                                            |                                                  |
| 271                        | 335912 | Primary battery manufacturing                                            |                                                  |
| 272                        | 335920 | Communication and energy wire and cable manufacturing                    |                                                  |
| 273                        | 335930 | Wiring device manufacturing                                              |                                                  |
| 274                        | 335991 | Carbon and graphite product manufacturing                                |                                                  |
| 275                        | 335999 | All other miscellaneous electrical equipment and component manufacturing |                                                  |
| 276                        | 336111 | Automobile manufacturing                                                 | Vehicles and other transportation equipment (18) |
| 277                        | 336112 | Light truck and utility vehicle manufacturing                            |                                                  |
| 278                        | 336120 | Heavy duty truck manufacturing                                           |                                                  |
| 279                        | 336211 | Motor vehicle body manufacturing                                         |                                                  |
| 280                        | 336212 | Truck trailer manufacturing                                              |                                                  |
| 281                        | 336213 | Motor home manufacturing                                                 |                                                  |
| 282                        | 336214 | Travel trailer and camper manufacturing                                  |                                                  |
| 283                        | 336300 | Motor vehicle parts manufacturing                                        |                                                  |
| 284                        | 336411 | Aircraft manufacturing                                                   |                                                  |
| 285                        | 336412 | Aircraft engine and engine parts manufacturing                           |                                                  |
| 286                        | 336413 | Other aircraft parts and auxiliary equipment manufacturing               |                                                  |
| 287                        | 336414 | Guided missile and space vehicle manufacturing                           |                                                  |
| 288                        | 33641A | Propulsion units and parts for space vehicles and guided missiles        |                                                  |
| 289                        | 336500 | Railroad rolling stock manufacturing                                     |                                                  |
| 290                        | 336611 | Ship building and repairing                                              |                                                  |
| 291                        | 336612 | Boat building                                                            |                                                  |
| 292                        | 336991 | Motorcycle, bicycle and parts manufacturing                              |                                                  |
| 293                        | 336992 | Military armored vehicle, tank and tank component manufacturing          |                                                  |
| 294                        | 336999 | All other transportation equipment manufacturing                         |                                                  |
| 295                        | 337110 | Wood kitchen cabinet and countertop manufacturing                        | Furniture, Medical Equipment and supplies(19)    |
| Continued on next page ... |        |                                                                          |                                                  |

**Table S.2 – continued from previous page**

| Table S.2 – continued from previous page |        |                                                                               |                                                    |
|------------------------------------------|--------|-------------------------------------------------------------------------------|----------------------------------------------------|
| Number                                   | NAICS  | Sector Name                                                                   | Aggregated Sectors                                 |
| 296                                      | 337121 | Upholstered household furniture manufacturing                                 |                                                    |
| 297                                      | 337122 | Nonupholstered wood household furniture manufacturing                         |                                                    |
| 298                                      | 337127 | Institutional furniture manufacturing                                         |                                                    |
| 299                                      | 33712A | Metal and other household furniture (except wood) manufacturing               |                                                    |
| 300                                      | 337212 | Office furniture and custom architectural woodwork and millwork manufacturing |                                                    |
| 301                                      | 337215 | Showcase, partition, shelving and locker manufacturing                        |                                                    |
| 302                                      | 33721A | Wood television, radio and sewing machine cabinet manufacturing               |                                                    |
| 303                                      | 337910 | Mattress manufacturing                                                        |                                                    |
| 304                                      | 337920 | Blind and shade manufacturing                                                 |                                                    |
| 305                                      | 339111 | Laboratory apparatus and furniture manufacturing                              |                                                    |
| 306                                      | 339112 | Surgical and medical instrument manufacturing                                 |                                                    |
| 307                                      | 339113 | Surgical appliance and supplies manufacturing                                 |                                                    |
| 308                                      | 339114 | Dental equipment and supplies manufacturing                                   |                                                    |
| 309                                      | 339115 | Ophthalmic goods manufacturing                                                |                                                    |
| 310                                      | 339116 | Dental laboratories                                                           |                                                    |
| 311                                      | 339910 | Jewelry and silverware manufacturing                                          | Other miscellaneous manufacturing(20)              |
| 312                                      | 339920 | Sporting and athletic goods manufacturing                                     |                                                    |
| 313                                      | 339930 | Doll, toy and game manufacturing                                              |                                                    |
| 314                                      | 339940 | Office supplies (except paper) manufacturing                                  |                                                    |
| 315                                      | 339950 | Sign manufacturing                                                            |                                                    |
| 316                                      | 339991 | Gasket, packing and sealing device manufacturing                              |                                                    |
| 317                                      | 339992 | Musical instrument manufacturing                                              |                                                    |
| 318                                      | 339994 | Broom, brush and mop manufacturing                                            |                                                    |
| 319                                      | 33999A | All other miscellaneous manufacturing                                         |                                                    |
| 320                                      | 420000 | Wholesale trade                                                               | Trade, Transportation and communications media(21) |
| 321                                      | 481000 | Air transportation                                                            |                                                    |
| 322                                      | 482000 | Rail transportation                                                           |                                                    |
| 323                                      | 483000 | Water transportation                                                          |                                                    |
| Continued on next page ...               |        |                                                                               |                                                    |

**Table S.2 – continued from previous page**

| Number | NAICS  | Sector Name                                                          | Aggregated Sectors                                       |
|--------|--------|----------------------------------------------------------------------|----------------------------------------------------------|
| 324    | 484000 | Truck transportation                                                 |                                                          |
| 325    | 485000 | Transit and ground passenger transportation                          |                                                          |
| 326    | 486000 | Pipeline transportation                                              |                                                          |
| 327    | 48A000 | Scenic, sightseeing transportation & support activities for transp.  |                                                          |
| 328    | 491000 | Postal service                                                       |                                                          |
| 329    | 492000 | Couriers and messengers                                              |                                                          |
| 330    | 493000 | Warehousing and storage                                              |                                                          |
| 331    | 4A0000 | Retail trade                                                         |                                                          |
| 332    | 511110 | Newspaper publishers                                                 |                                                          |
| 333    | 511120 | Periodical publishers                                                |                                                          |
| 334    | 511130 | Book publishers                                                      |                                                          |
| 335    | 5111A0 | Directory, mailing list and other publishers                         |                                                          |
| 336    | 511200 | Software publishers                                                  |                                                          |
| 337    | 512100 | Motion picture and video industries                                  |                                                          |
| 338    | 512200 | Sound recording industries                                           |                                                          |
| 339    | 515100 | Radio and television broadcasting                                    |                                                          |
| 340    | 515200 | Cable and other subscription programming                             |                                                          |
| 341    | 516110 | Internet publishing and broadcasting                                 |                                                          |
| 342    | 517000 | Telecommunications                                                   |                                                          |
| 343    | 518100 | Internet service providers and web search portals                    |                                                          |
| 344    | 518200 | Data processing, hosting and related services                        |                                                          |
| 345    | 519100 | Other information services                                           |                                                          |
| 346    | 522A00 | Nondepository credit intermediation and related activities           | Finance, Insurance, real Estate, Rental and Leasing (22) |
| 347    | 523000 | Securities, commodity contracts, investments and related activities  |                                                          |
| 348    | 524100 | Insurance carriers                                                   |                                                          |
| 349    | 524200 | Insurance agencies, brokerages and related activities                |                                                          |
| 350    | 525000 | Funds, trusts and other financial vehicles                           |                                                          |
| 351    | 52A000 | Monetary authorities and depository credit intermediation            |                                                          |
| 352    | 531000 | Real estate                                                          |                                                          |
| 353    | 532100 | Automotive equipment rental and leasing                              |                                                          |
| 354    | 532230 | Video tape and disc rental                                           |                                                          |
| 355    | 532400 | Commercial and industrial machinery and equipment rental and leasing |                                                          |
|        |        |                                                                      | Continued on next page ...                               |

**Table S.2 – continued from previous page**

| Table S.2 – continued from previous page |        |                                                                            |                                                       |
|------------------------------------------|--------|----------------------------------------------------------------------------|-------------------------------------------------------|
| Number                                   | NAICS  | Sector Name                                                                | Aggregated Sectors                                    |
| 356                                      | 532A00 | General and consumer goods rental except video tapes and discs             |                                                       |
| 357                                      | 533000 | Lessors of non-financial intangible as-<br>sets                            |                                                       |
| 358                                      | 541100 | Legal services                                                             | Professional & Technical Ser-<br>vices (23)           |
| 359                                      | 541200 | Accounting, tax preparation, book-<br>keeping and payroll services         |                                                       |
| 360                                      | 541300 | Architectural,engineering and related<br>services                          |                                                       |
| 361                                      | 541400 | Specialized design services                                                |                                                       |
| 362                                      | 541511 | Custom computer programming ser-<br>vices                                  |                                                       |
| 363                                      | 541512 | Computer systems design services                                           |                                                       |
| 364                                      | 54151A | Other computer related services, in-<br>cluding facilities management      |                                                       |
| 365                                      | 541610 | Management, scientific and technical<br>consulting services                |                                                       |
| 366                                      | 5416A0 | Environmental and other technical<br>consulting services                   |                                                       |
| 367                                      | 541700 | Scientific research and development<br>services                            |                                                       |
| 368                                      | 541800 | Advertising and related services                                           |                                                       |
| 369                                      | 541920 | Photographic services                                                      |                                                       |
| 370                                      | 541940 | Veterinary services                                                        |                                                       |
| 371                                      | 5419A0 | All other miscellaneous professional,<br>scientific and technical services |                                                       |
| 372                                      | 550000 | Management of companies and enter-<br>prises                               | Management, Administrative<br>and waste services (24) |
| 373                                      | 561100 | Office administrative services                                             |                                                       |
| 374                                      | 561200 | Facilities support services                                                |                                                       |
| 375                                      | 561300 | Employment services                                                        |                                                       |
| 376                                      | 561400 | Business support services                                                  |                                                       |
| 377                                      | 561500 | Travel arrangement and reservation<br>services                             |                                                       |
| 378                                      | 561600 | Investigation and security services                                        |                                                       |
| 379                                      | 561700 | Services to buildings and dwellings                                        |                                                       |
| 380                                      | 561900 | Other support services                                                     |                                                       |
| 381                                      | 562000 | Waste management and remediation<br>services                               |                                                       |
| 382                                      | 611100 | Elementary and secondary schools                                           | Education and Health Care<br>Services (25)            |
| 383                                      | 611A00 | Junior colleges, colleges,universities<br>and professional schools         |                                                       |
| Continued on next page ...               |        |                                                                            |                                                       |

**Table S.2 – continued from previous page**

| Table S.2 – continued from previous page |        |                                                                                     |                                                    |
|------------------------------------------|--------|-------------------------------------------------------------------------------------|----------------------------------------------------|
| Number                                   | NAICS  | Sector Name                                                                         | Aggregated Sectors                                 |
| 384                                      | 611B00 | Other educational services                                                          |                                                    |
| 385                                      | 621600 | Home health care services                                                           |                                                    |
| 386                                      | 621A00 | Offices of physicians, dentists and other health practitioners                      |                                                    |
| 387                                      | 621B00 | Medical, diagnostic labs, outpatient and other ambulatory care services             |                                                    |
| 388                                      | 622000 | Hospitals                                                                           |                                                    |
| 389                                      | 623000 | Nursing and residential care facilities                                             |                                                    |
| 390                                      | 624200 | Community food, housing and other relief services including rehabilitation services |                                                    |
| 391                                      | 624400 | Child day care services                                                             |                                                    |
| 392                                      | 624A00 | Individual and family services                                                      |                                                    |
| 393                                      | 711100 | Performing arts companies                                                           | Arts, Entertainment, Hotels and Food Services (26) |
| 394                                      | 711200 | Spectator sports                                                                    |                                                    |
| 395                                      | 711500 | Independent artists, writers and performers                                         |                                                    |
| 396                                      | 711A00 | Promoters of performing arts and sports and agents for public figures               |                                                    |
| 397                                      | 712000 | Museums, historical sites, zoos and parks                                           |                                                    |
| 398                                      | 713940 | Fitness and recreational sports centers                                             |                                                    |
| 399                                      | 713950 | Bowling centers                                                                     |                                                    |
| 400                                      | 713A00 | Amusement parks, arcades and gambling industries                                    |                                                    |
| 401                                      | 713B00 | Other amusement and recreation industries                                           |                                                    |
| 402                                      | 7211A0 | Hotels and motels including casino hotels                                           |                                                    |
| 403                                      | 721A00 | Other accommodations                                                                |                                                    |
| 404                                      | 722000 | Food services and drinking places                                                   |                                                    |
| 405                                      | 811192 | Car washes                                                                          | Other services except Public Administration (27)   |
| 406                                      | 8111A0 | Automotive repair and maintenance except car washes                                 |                                                    |
| 407                                      | 811200 | Electronic and precision equipment repair and maintenance                           |                                                    |
| 408                                      | 811300 | Commercial and industrial machinery and equipment repair and maintenance            |                                                    |
| 409                                      | 811400 | Personal and household goods repair and maintenance                                 |                                                    |
| 410                                      | 812100 | Personal care services                                                              |                                                    |
| Continued on next page ...               |        |                                                                                     |                                                    |

| Table S.2 – continued from previous page |        |                                                        |                                    |
|------------------------------------------|--------|--------------------------------------------------------|------------------------------------|
| Number                                   | NAICS  | Sector Name                                            | Aggregated Sectors                 |
| 411                                      | 812200 | Death care services                                    | Government & Special Services (28) |
| 412                                      | 812300 | Dry-cleaning and laundry services                      |                                    |
| 413                                      | 812900 | Other personal services                                |                                    |
| 414                                      | 813100 | Religious organizations                                |                                    |
| 415                                      | 813A00 | Grantmaking, giving and social advocacy organizations  |                                    |
| 416                                      | 813B00 | Civic, social, professional, and similar organizations |                                    |
| 417                                      | 814000 | Private households                                     |                                    |
| 418                                      | S00101 | Federal electric utilities                             |                                    |
| 419                                      | S00102 | Other Federal Government enterprises                   |                                    |
| 420                                      | S00201 | State and local government passenger transit           |                                    |
| 421                                      | S00202 | State and local government electric utilities          |                                    |
| 422                                      | S00203 | Other state and local government enterprises           |                                    |
| 423                                      | S00500 | General Federal defense government services            |                                    |
| 424                                      | S00600 | General Federal nondefense government services         |                                    |
| 425                                      | S00700 | General state and local government services            |                                    |
| 426                                      | S00800 | Owner-occupied dwellings                               |                                    |

Figure S.19 shows comparison among three components of the Nitrogen inventory.

## References

- [1] Atmospheric Chemistry and green house gases. IPCC Third Assessment Report - Climate Change 2001.
- [2] National emissions inventory (nei) air pollutant emissions trends data. <http://www.epa.gov/ttnchie1/trends/> : Accessed April 2012.
- [3] Reactive nitrogen in the united states : An analysis of inputs, flows, consequences, and management options. US Environmental Protection Agency, Accessed Online September 2011.
- [4] USGS Mineral Profile. <http://minerals.usgs.gov/ds/2005/140/>, 2005.
- [5] USGS Nitrogen Consumption Data. <http://minerals.usgs.gov/ds/2005/140/nitrogen-use.xls>, 2005.
- [6] USGS Water Quality Assessment Program. <http://pubs.usgs.gov/sir/2006/5107/>, 2006.

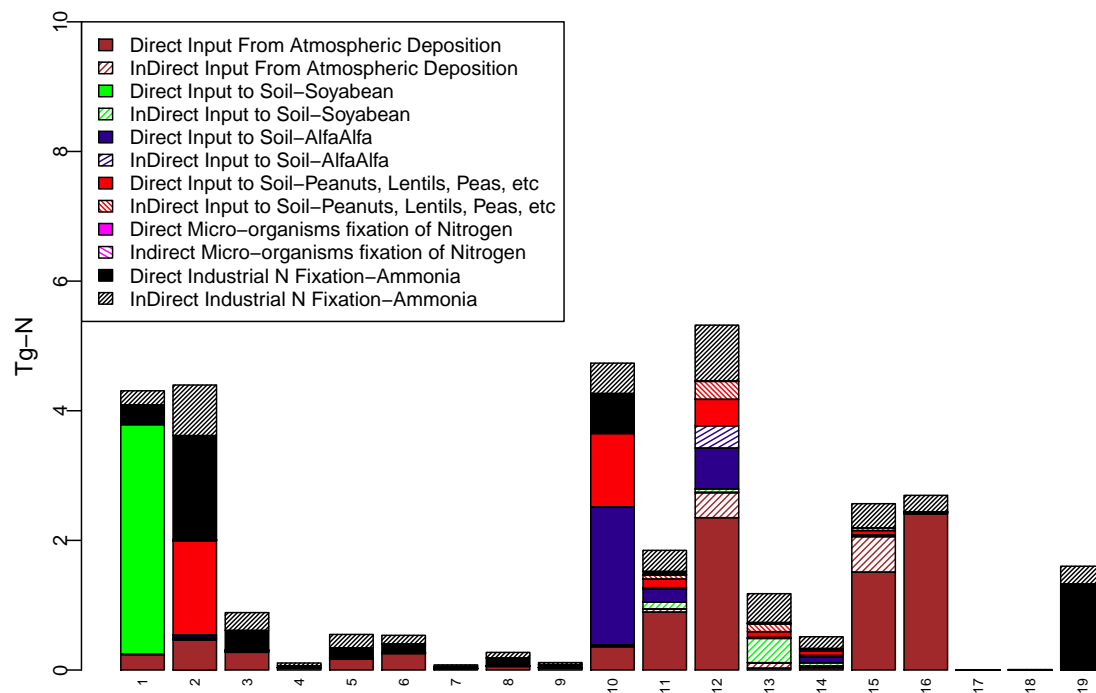

Figure S.4: N mobilization for aggregate sector “Agriculture, Livestock, Forestry and Fisheries (1).” Legend for x-axis. 1: Oilseed farming 2: Grain farming 3: Vegetable and Melon farming 4: Tree Nut farming 5: Fruit farming 6: Greenhouse, nursery and floriculture production 7: Tobacco farming 8: Cotton farming 9: Sugarcane and sugar beet farming 10: All other crop farming 11: Dairy cattle and milk production 12: Cattle ranching and farming 13: Poultry and egg production 14: Animal production (other) 15: Logging 16: Forest nurseries, forest productions and timber tracts 17: Fishing 18: Hunting and trapping 19: Support activities for agriculture and forestry

- [7] Manure Use for Fertilizer and for Energy : Report to Congress. <http://www.ers.usda.gov/publications/ap-administrative-publication/ap-037.aspx#.Ua-z4Nj> 2009. Administrative Publication No. (AP-037) 53 pp, June 2009.
- [8] H. Benjamin Z., W. Ying-Ping, V. Peter M., and C. B. Field. A unifying framework for dinitrogen fixation in the terrestrial biosphere. *Nature*, 454, 2008.
- [9] EPA. EPA GHG Inventory. <http://epa.gov/climatechange/emissions/usinventoryreport.html>, 2008.
- [10] J. Galloway, A. Townsend, J. W. Erisman, M. Bekunda, Z. Cai, J. Freney, L. Martinelli, S. P. Seitzinger, and M. A. Sutton. Transformation of the nitrogen cycle: Recent Trends, Questions and Potential Solutions. *Science*, 320:889–892, 2008.
- [11] J. N. Galloway. Nitrogen Mobilization in Asia. *Nutrient Cycling in Agroecosystems*, 57:1–12, 2000.
- [12] J. N. Galloway. Acidification Of The World : Natural and Anthropogenic. *Water, Air and Soil Pollution*, 130:17–24, 2001.



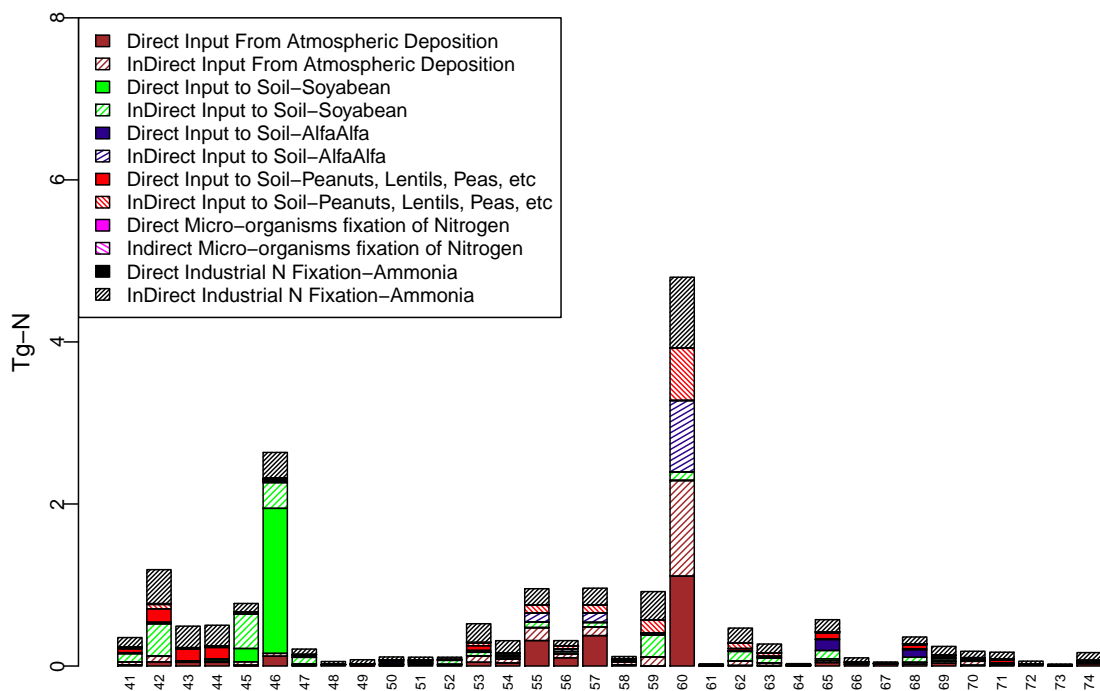

Figure S.5: N mobilization for aggregate sector “Food,Beverage & Tobacco (4).” Legend for x-axis. Legend for x-axis is in Table S.2.

- [13] J. N. Galloway, W. H. Schlesinger, H. L. II, A. Michaels, and J. L. Schnoor. Nitrogen Fixation : Anthropogenic enhancement-environmental response. *Global Biogeochemical Cycles*, 9:235–252, 1995.
- [14] J.W.Erisman, J. Galloway, M. Sutton, Z. Klimont, and W. Winiwarter. How a century of ammonia synthesis changed the world. *Nature Geoscience*, 1:636–639, 2008.
- [15] F. of the Condition and T. W. G. M. E. Assessment. *Ecosystems and Human Well-Being: Current State and Trends*, volume 1 of *Millennium Ecosystem Assessment Series*. Island Press, 2005.
- [16] H. Robert W., B. Elizabeth W., P. Wendy J., and G. James N. Nitrogen Use in the United States from 1961-2000 and Potential Future Trends. *Ambio*, 31(2), 2002.
- [17] H. R.W.F. and H. U.D. Nitrogen fixation research : A key to world food. *Science*, 188, May 1975.
- [18] W. H. Schlesinger, editor. *Biogeochemistry An Analysis of Global Change*. Academic Press, 1997.
- [19] P. M. Vitousek, J. D. Aber, R. W. Howarth, G. E. Likens, P. A. Matson, D. W. Schindler, W. H. Schlesinger, and D. G. Tilman. Human Alteration of the global Nitrogen Cycle: Sources and Consequences. *Ecological Applications*, 7(3):737–750, 1997.
- [20] X. Xiaobo and A. E. Landis. Eutrophication Potential of Food Consumption Patterns. *Environmental Science. Technology*, 44(16):6450 – 6456, 2010.

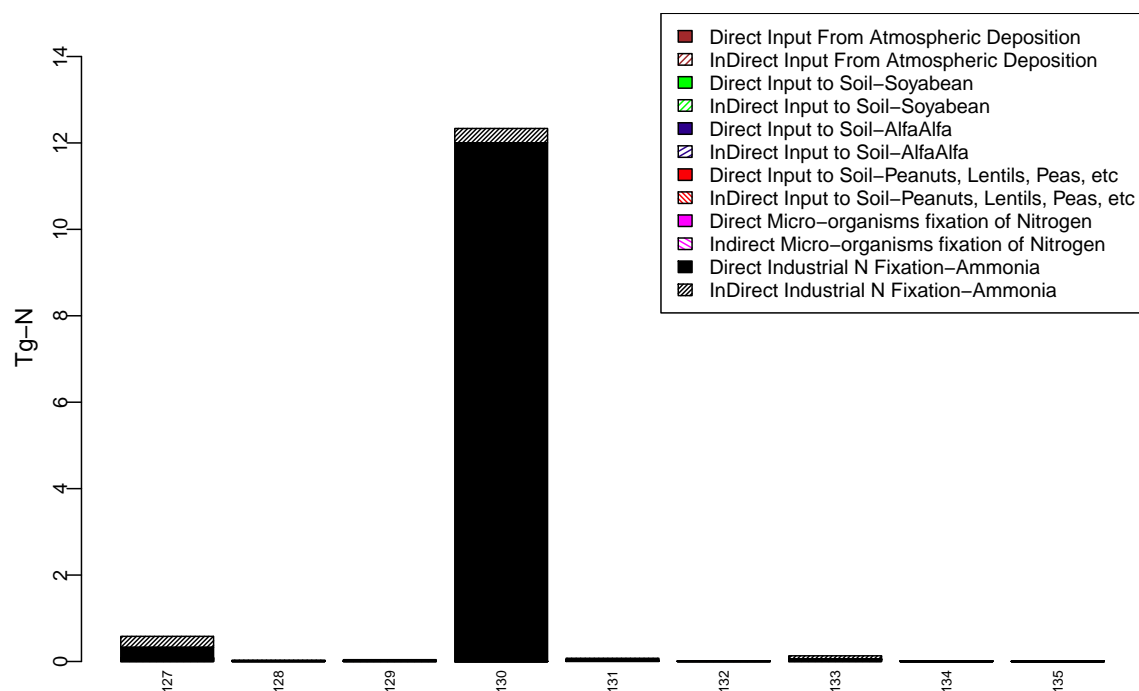

Figure S.6: N mobilization for aggregate sector “Resin, Rubber, Artificial Fibers, Agri Chem & Pharma (8).” Legend for x-axis is in Table S.2.

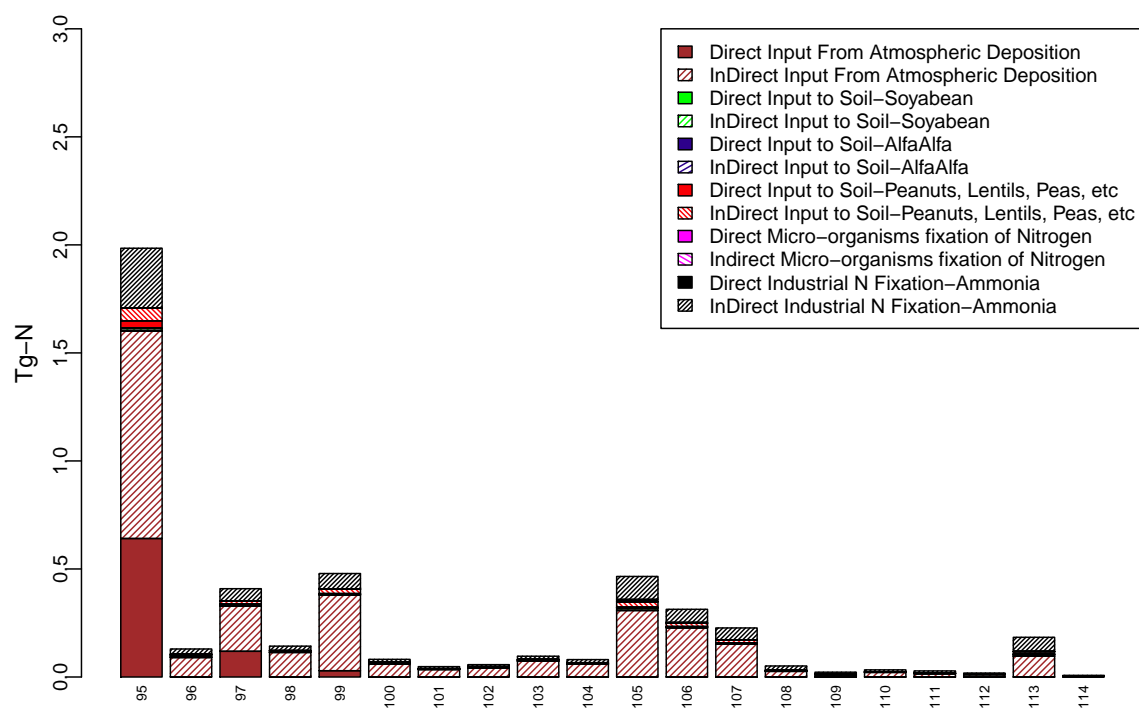

Figure S.7: N mobilization for aggregate sector “Wood, Paper & Printing (6).” Legend for x-axis is in Table S.2.

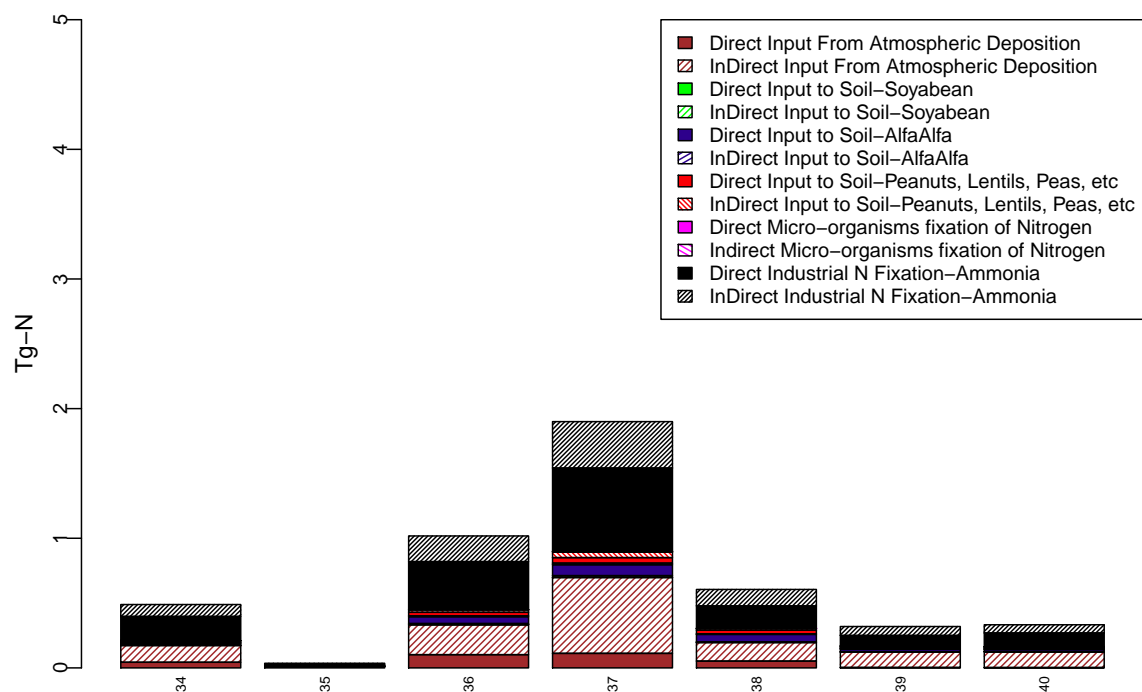

Figure S.8: N mobilization for aggregate sector "Construction (3)." Legend for x-axis is in Table S.2.

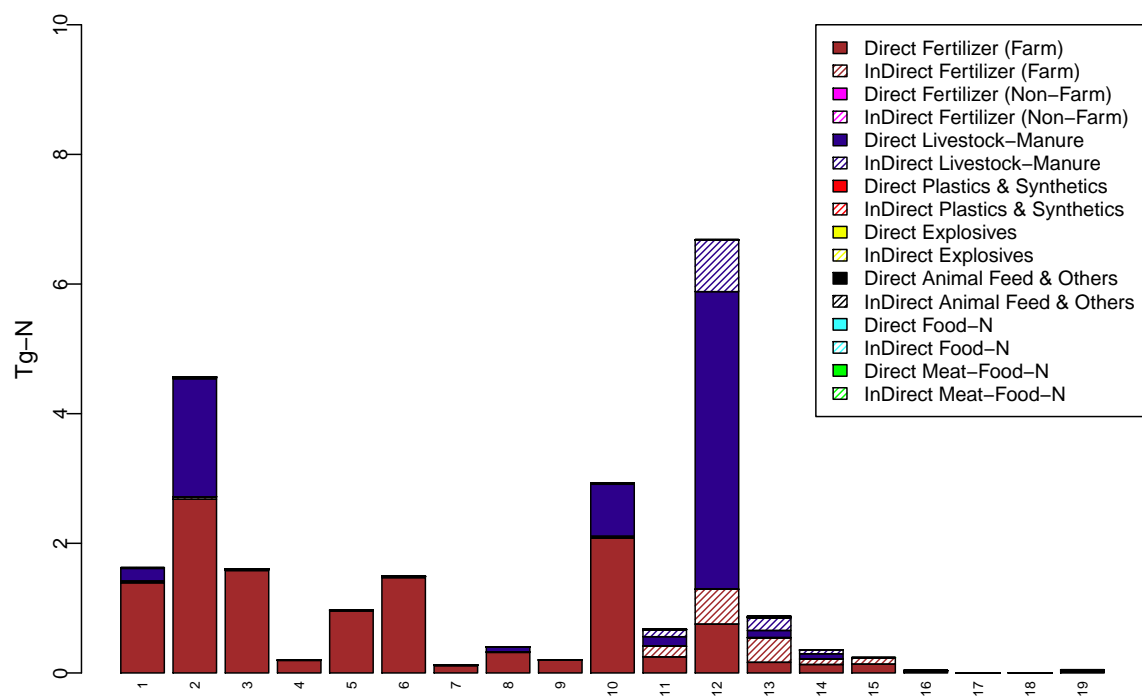

Figure S.9: N in products for aggregate sector "Agriculture, Livestock, Forestry and Fisheries (1)." Legend for x-axis is in Table S.2.

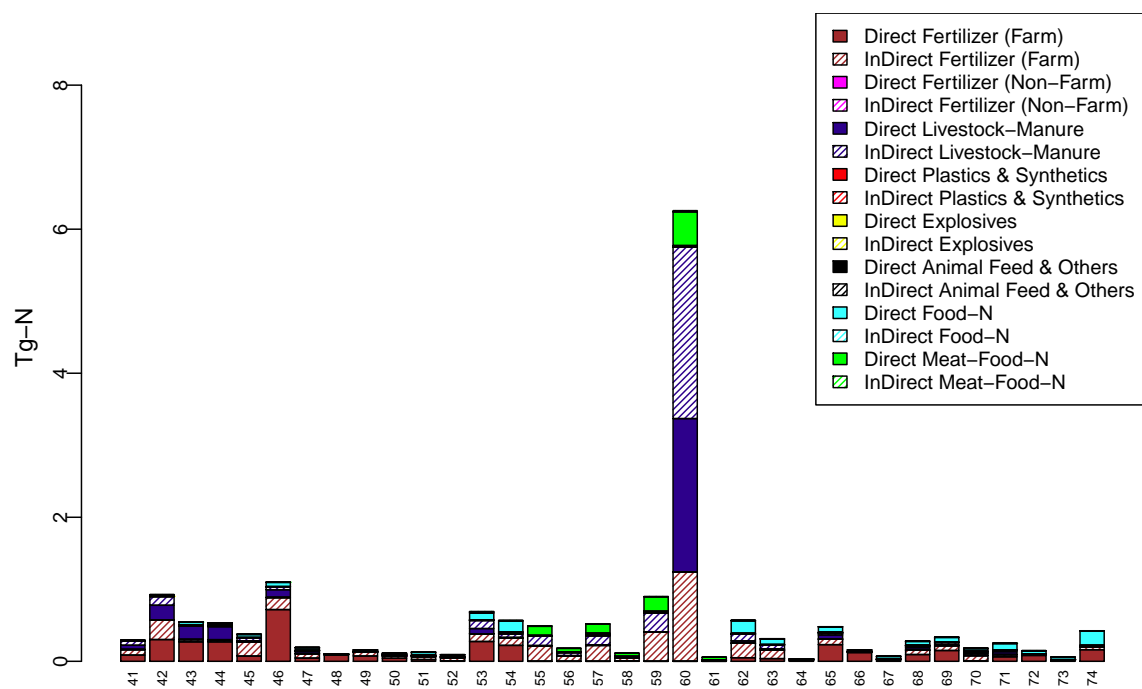

Figure S.10: N in products for aggregate sector “Food, Beverage and Tobacco (4).” Legend for x-axis is in Table S.2.

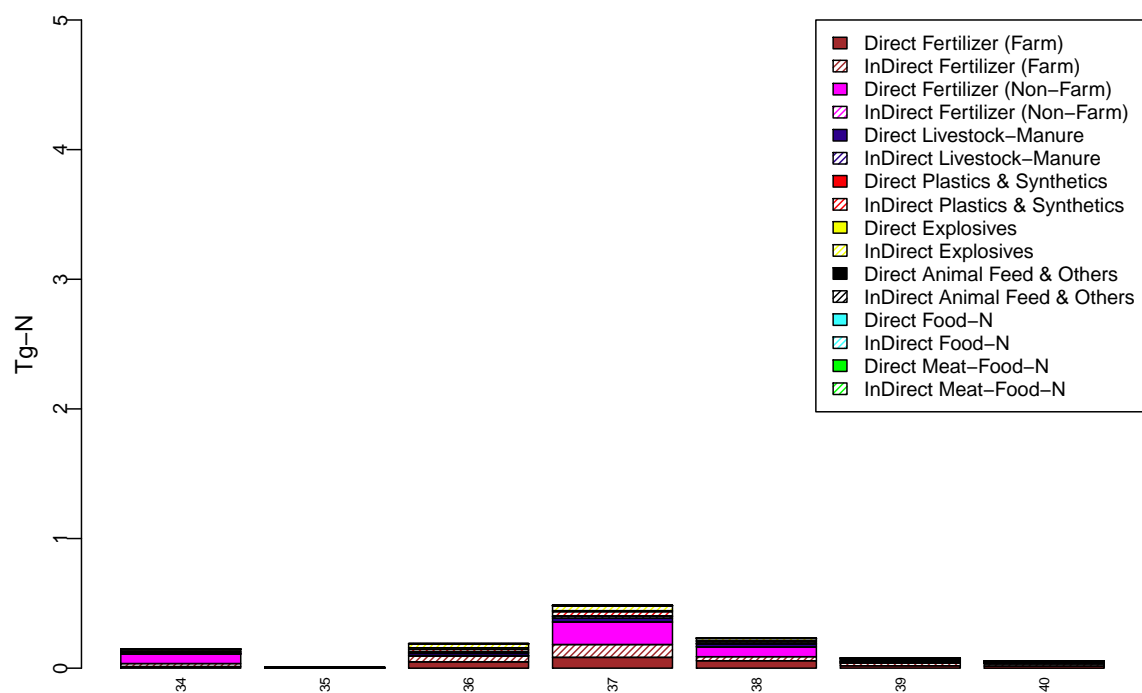

Figure S.11: N in products for aggregate sector “Construction (3).” Legend for x-axis is in Table S.2.

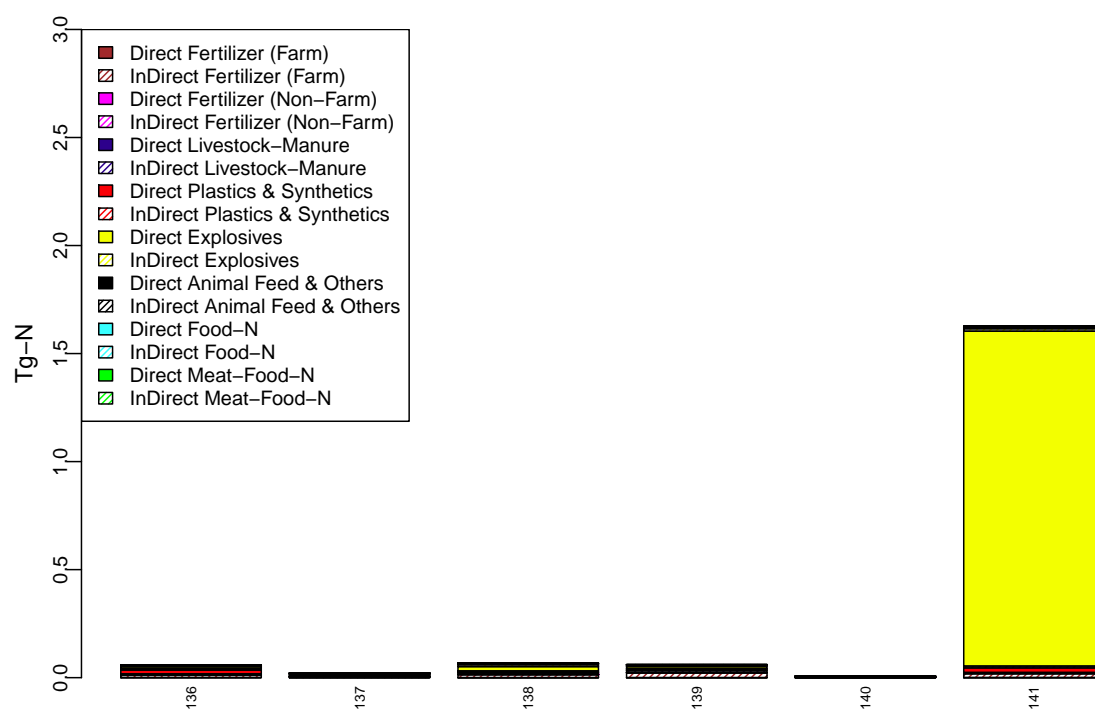

Figure S.12: N in products for aggregate sector "Paint, Adhesives, Cleaning & other Chemicals (9)." Legend for x-axis is in Table S.2.

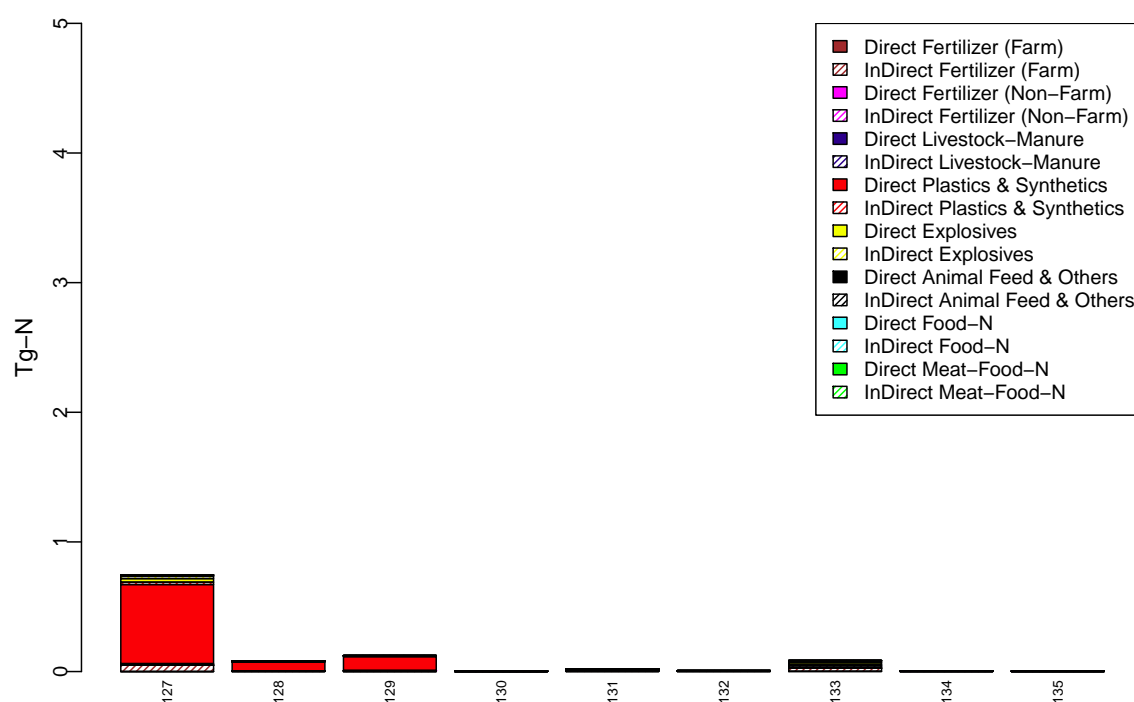

Figure S.13: N in products for aggregate sector "Resin, Rubber, Artificial fibers, Agri. Chemicals & Pharma (8)." Legend for x-axis is in Table S.2.

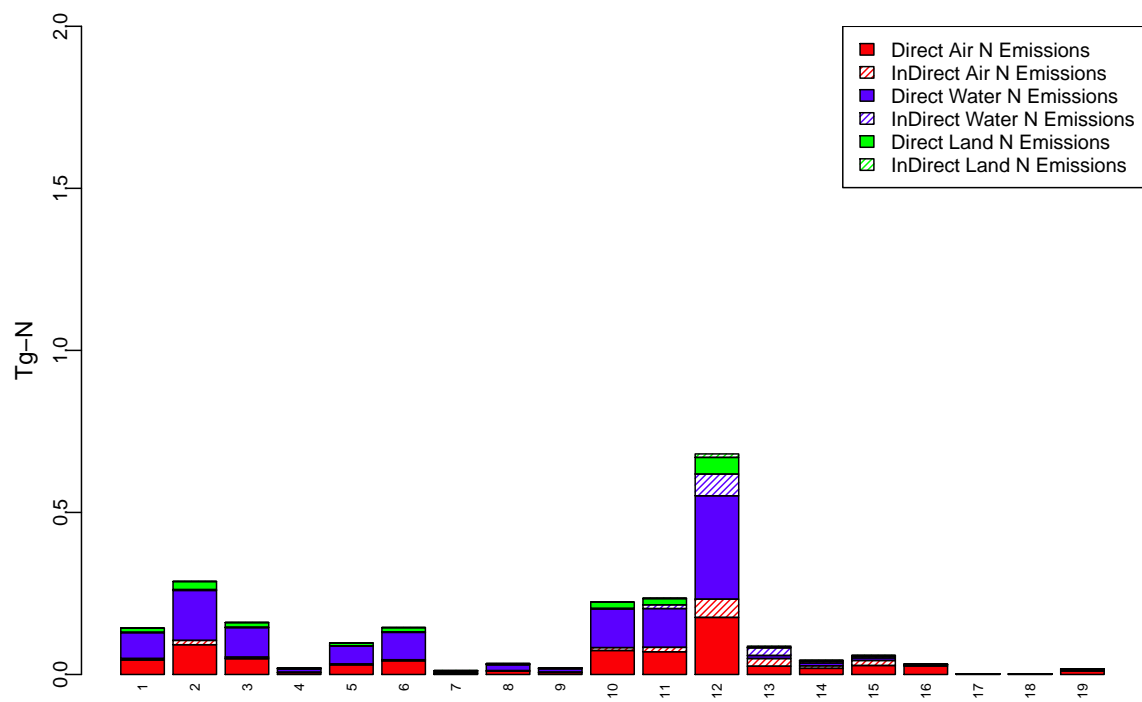

Figure S.14: N emissions from aggregate sector “Agriculture, Livestock, Forestry and Fisheries (1).” Legend for x-axis is in Table S.2.

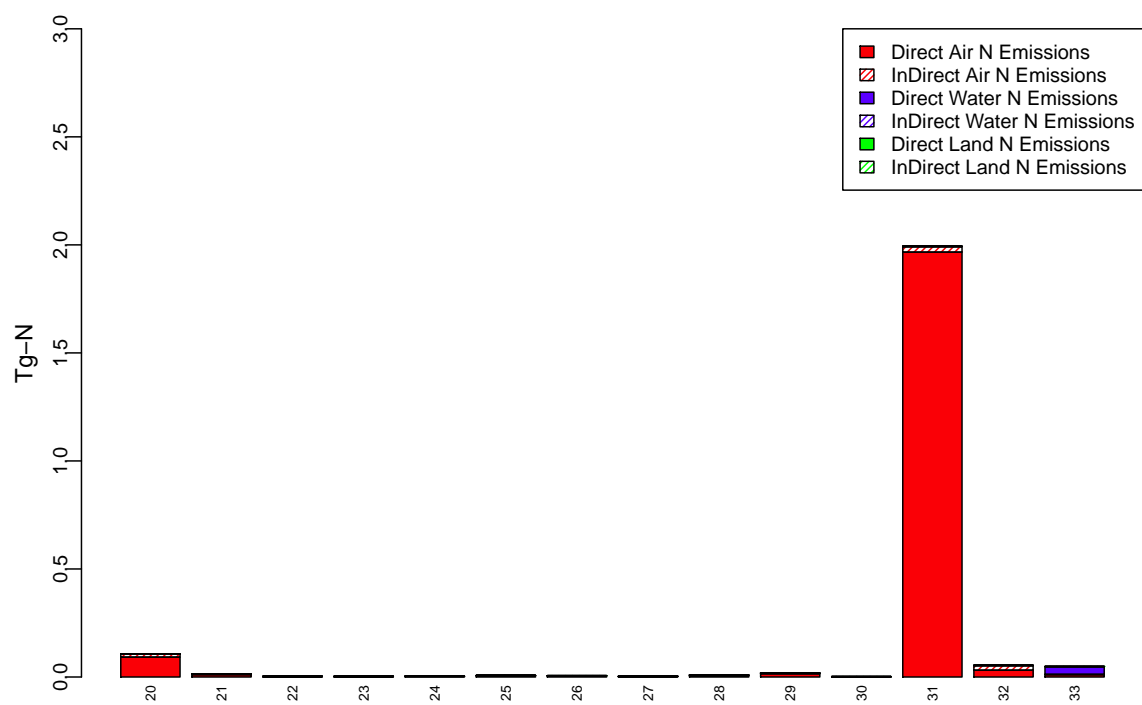

Figure S.15: N emissions from aggregate sector “Mining and Utilities (2).” Legend for x-axis is in Table S.2.

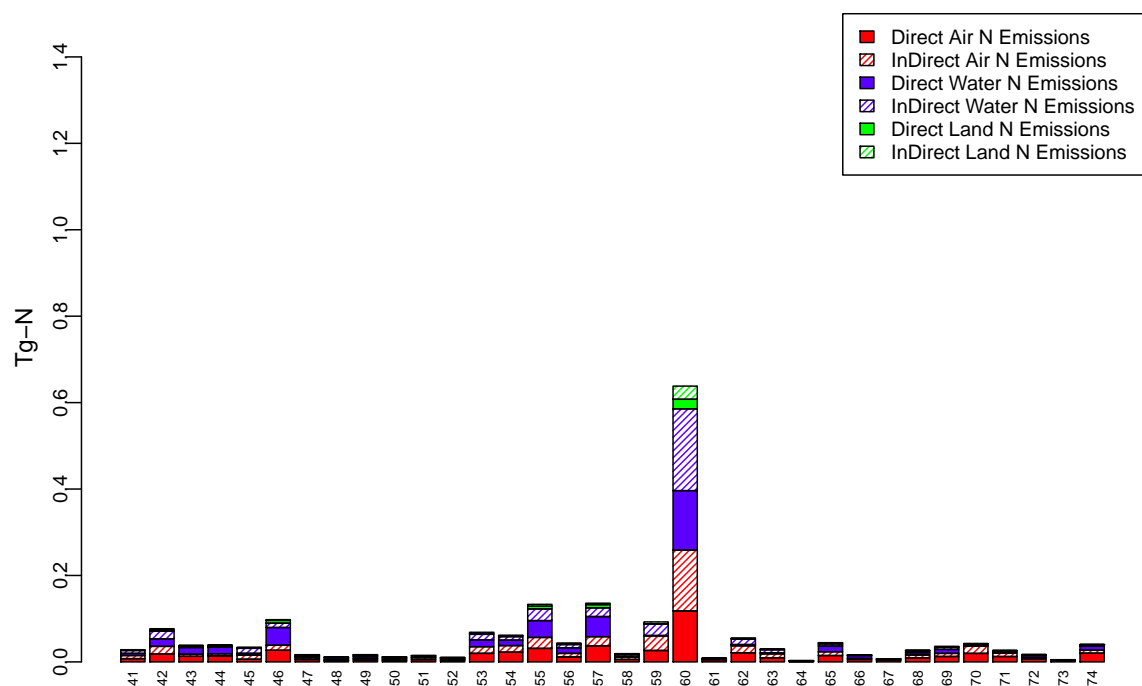

Figure S.16: N emissions from aggregate sector “Food, Beverage and Tobacco (4).” Legend for x-axis is in Table S.2.

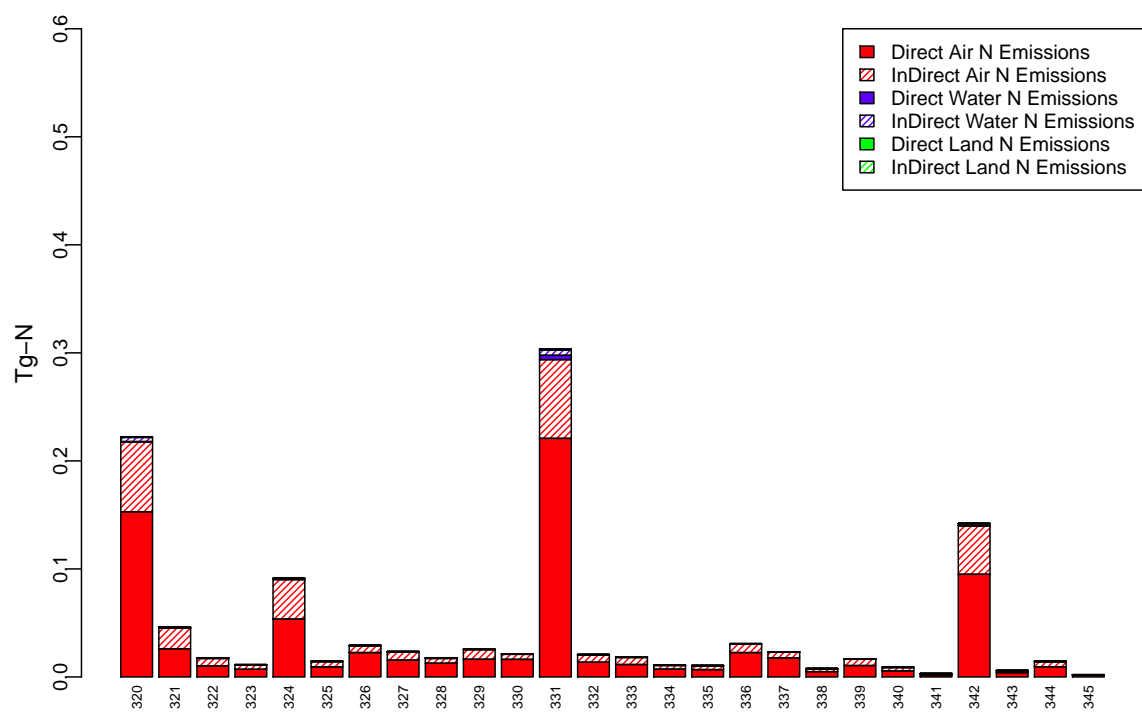

Figure S.17: N emissions from aggregate sector “Trade, Transportation & Commu. media (21).” Legend for x-axis is in Table S.2.

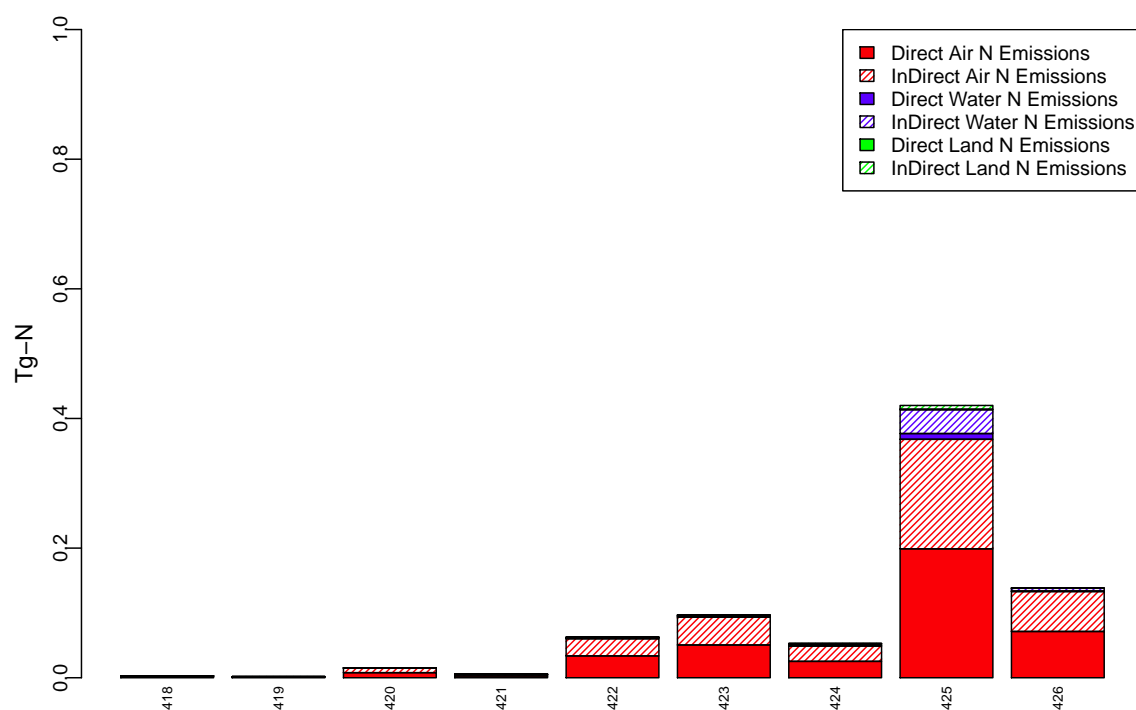

Figure S.18: N emissions from aggregate sector “Government & Special Services (28).” Legend for x-axis is in Table S.2.



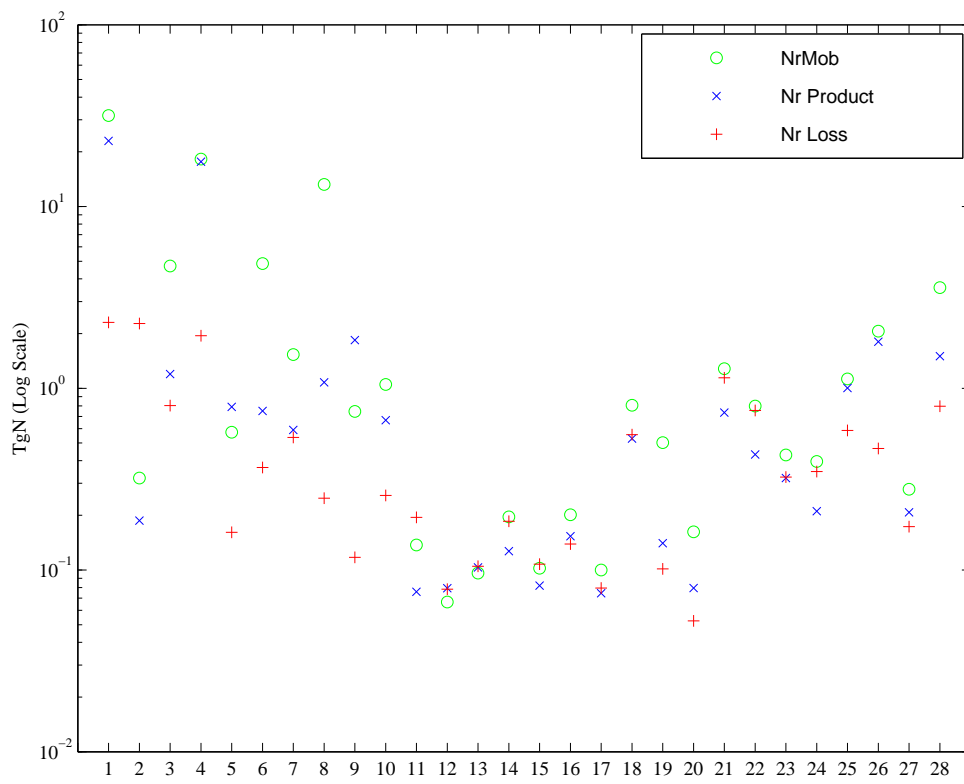

Figure S.19: Comparing N Flow Categories in Aggregated Sectors.  
 Legend for x-axis is in Column 4 of Table S.19 given in brackets.
